# Supplementary material for: Rising temperatures reduce global wheat production
Source: Springer Nature journal article supplement (doi:10.1038/nclimate2470), 2014-12-19
Supplement: 41558_2015_BFnclimate2470_MOESM348_ESM.pdf [file 41558_2015_BFnclimate2470_MOESM348_ESM.pdf]

# Rising temperatures reduce global wheat production

## Supplementary Materials

### **Rising temperatures reduce global wheat production**

S. Asseng, F. Ewert, P. Martre, R.P. Rötter, D.B. Lobell, D. Cammarano, B.A. Kimball, M.J. Ottman, G.W. Wall, J.W. White, M.P. Reynolds, P.D. Alderman, P.V.V. Prasad, P.K. Aggarwal, J. Anothai, B. Basso, C. Biernath, A.J. Challinor, G. De Sanctis, J. Doltra, E. Fereres, M. Garcia-Vila, S. Gayler, G. Hoogenboom, L.A. Hunt, R.C. Izaurralde, M. Jabloun, C.D. Jones, K.C. Kersebaum, A.-K. Koehler, C. Müller, S. Naresh Kumar, C. Nendel, G. O'Leary, J. E. Olesen, T. Palosuo, E. Priesack, E. Eyshi Rezaei, A.C. Ruane, M.A. Semenov, I. Shcherbak, C. Stöckle, P. Stratonovitch, T. Streck, I. Supit, F. Tao, P. Thorburn, K. Waha, E. Wang, D. Wallach, J. Wolf, Z. Zhao, and Y. Zhu

Correspondance to: [sasseng@ufl.edu](mailto:sasseng@ufl.edu)

#### **This PDF file includes:**

- Supplementary Materials and Methods
- Supplementary Results
- Supplementary Figures S1 to S17
- Supplementary Tables S1 to S5
- Supplementary Appendix Table SA1

## 22 **Supplementary Materials and Methods**

23 Thirty wheat crop models, including 29 deterministic process-based simulation models and one statistical  
24 model, (Supplementary Table S1 and S2) were compared within the Agricultural Model Intercomparison  
25 and Improvement Project<sup>1</sup> (AgMIP; [www.agmip.org](http://www.agmip.org)), with two data sets from quality-assessed field  
26 experiments (sentinel site data).

27

### 28 *Hot-Serial-Cereal (HSC)*

29 One site was the Hot-Serial-Cereal (HSC) experiment with time-of-sowing and artificial infrared heating  
30 treatments under field conditions using cv Yecora Rojo, characterized by low to no vernalization  
31 requirements and photoperiod sensitivity<sup>2,3</sup>. Individual field replicates were used from<sup>2,3</sup> for the simulations  
32 which were previously not publicly available (therefore called a “blind” analysis).

33 All experiments were well watered and fertilized with temperature being the most important variable. A  
34 model inter-comparison was carried out using standardized protocols and several steps of calibration.

35

36 **Supplementary Table S1.** Crop models (30) used in AgMIP Wheat study.

| Model (version)                    | Reference | Documentation                                                                                                             |
|------------------------------------|-----------|---------------------------------------------------------------------------------------------------------------------------|
| APSIM-E                            | 4-6       | <a href="http://www.apsim.info/Wiki/">http://www.apsim.info/Wiki/</a>                                                     |
| APSIM-Nwheat (V.1.55)              | 4, 7, 8   | <a href="http://www.apsim.info">http://www.apsim.info</a>                                                                 |
| APSIM-Wheat (V.7.3)                | 4         | <a href="http://www.apsim.info/Wiki/">http://www.apsim.info/Wiki/</a>                                                     |
| AQUACROP (V.4.0)                   | 9         | <a href="http://www.fao.org/nr/water/aquacrop.html">http://www.fao.org/nr/water/aquacrop.html</a>                         |
| CropSyst (V.3.04.08)               | 10        | <a href="http://www.bsyse.wsu.edu/CS_Suite/CropSyst/index.html">http://www.bsyse.wsu.edu/CS_Suite/CropSyst/index.html</a> |
| DAISY (V.5.18)                     | 11, 12    | <a href="https://code.google.com/p/daisy-model/">https://code.google.com/p/daisy-model/</a>                               |
| DSSAT- CERES (V.4.0.1.0)           | 13-15     | <a href="http://www.icasa.net/dssat/">http://www.icasa.net/dssat/</a>                                                     |
| DSSAT-CROPSIM (V4.5.1.013)         | 14, 16    | <a href="http://www.icasa.net/dssat/">http://www.icasa.net/dssat/</a>                                                     |
| EPIC (V1102)                       | 17-19     | <a href="http://epicapex.brc.tamus.edu/">http://epicapex.brc.tamus.edu/</a>                                               |
| Expert-N (V3.0.10) - CERES (V2.0)  | 20-23     | <a href="http://www.helmholtz-muenchen.de/en/iboe/expertn/">http://www.helmholtz-muenchen.de/en/iboe/expertn/</a>         |
| Expert-N (V3.0.10) – GECROS (V1.0) | 22, 23    | <a href="http://www.helmholtz-muenchen.de/en/iboe/expertn/">http://www.helmholtz-muenchen.de/en/iboe/expertn/</a>         |

|                                  |                |                                                                                                                                                                           |
|----------------------------------|----------------|---------------------------------------------------------------------------------------------------------------------------------------------------------------------------|
| Expert-N (V3.0.10) – SPASS (2.0) | 20, 22-25      | <a href="http://www.helmholtz-muenchen.de/en/iboe/expertn/">http://www.helmholtz-muenchen.de/en/iboe/expertn/</a>                                                         |
| Expert-N (V3.0.10) - SUCROS (V2) | 20, 22, 23, 26 | <a href="http://www.helmholtz-muenchen.de/en/iboe/expertn/">http://www.helmholtz-muenchen.de/en/iboe/expertn/</a>                                                         |
| FASSET (V.2.0)                   | 27, 28         | <a href="http://www.fasset.dk">http://www.fasset.dk</a>                                                                                                                   |
| GLAM (V.2)                       | 29, 30         | <a href="http://www.see.leeds.ac.uk/research/icas/climate-impacts-group/research/glam/">http://www.see.leeds.ac.uk/research/icas/climate-impacts-group/research/glam/</a> |
| HERMES (V.4.26)                  | 31, 32         | <a href="http://www.zalf.de/en/forschung/institute/lisa/forschung/oekomod/hermes">http://www.zalf.de/en/forschung/institute/lisa/forschung/oekomod/hermes</a>             |
| INFOCROP (V.1)                   | 33             | <a href="http://www.iari.res.in">http://www.iari.res.in</a>                                                                                                               |
| LINTUL (V.1)                     | 34, 35         | <a href="http://models.pps.wur.nl/models">http://models.pps.wur.nl/models</a>                                                                                             |
| LOBELL                           | 36             | Request from <a href="mailto:dlobell@stanford.edu">dlobell@stanford.edu</a>                                                                                               |
| LPJmL (V3.2)                     | 37-42          | <a href="http://www.pik-potsdam.de/research/projects/lpjweb">http://www.pik-potsdam.de/research/projects/lpjweb</a>                                                       |
| MCWLA-Wheat (V.2.0)              | 43-46          | Request from <a href="mailto:taofl@igsnr.ac.cn">taofl@igsnr.ac.cn</a>                                                                                                     |
| MONICA (V.1.0)                   | 47             | <a href="http://monica.agrosystem-models.com">http://monica.agrosystem-models.com</a>                                                                                     |
| OLEARY (V.7)                     | 48-51          | Request from <a href="mailto:gjoleary@yahoo.com">gjoleary@yahoo.com</a>                                                                                                   |
| SALUS (V.1.0)                    | 52, 53         | <a href="http://www.salusmodel.net">http://www.salusmodel.net</a>                                                                                                         |
| SIMPLACE (V.1)                   | 54             | Request from <a href="mailto:frank.ewert@uni-bonn.de">frank.ewert@uni-bonn.de</a>                                                                                         |
| SIRIUS (V2010)                   | 55-58          | <a href="http://www.rothamsted.ac.uk/mas-models/sirius.php">http://www.rothamsted.ac.uk/mas-models/sirius.php</a>                                                         |
| SiriusQuality (V.2.0)            | 59-61          | <a href="http://www1.clermont.inra.fr/siriusquality/">http://www1.clermont.inra.fr/siriusquality/</a>                                                                     |
| STICS (V.1.1)                    | 62, 63         | <a href="http://www.avignon.inra.fr/agroclim_stics_eng/">http://www.avignon.inra.fr/agroclim_stics_eng/</a>                                                               |
| WHEATGROW                        | 64-70          | Request from <a href="mailto:yanzhu@njau.edu.cn">yanzhu@njau.edu.cn</a>                                                                                                   |
| WOFOST (V.7.1)                   | 71             | <a href="http://www.wofost.wur.nl">http://www.wofost.wur.nl</a>                                                                                                           |

37

38

39 **Supplementary Table S2.** Consideration of temperature in wheat simulation models (For details see Alderman et al.<sup>72</sup>).

| Model             | Phenology       | Vernalization | Light Utilization | Respiration | Leaf growth     | Canopy temperature | Senescence | Grain set     | Grain growth    | Grain N Uptake  | Root growth     | Cold Hardening |
|-------------------|-----------------|---------------|-------------------|-------------|-----------------|--------------------|------------|---------------|-----------------|-----------------|-----------------|----------------|
| APSIM-E           | Am              | Am            | Am                | -           | Am              | -                  | An, Sm     | -             | Am              | Am              | Am              | -              |
| APSIM-Nwheat      | Am              | Am            | Am                | -           | Am              | -                  | Am, Ae, Af | Am            | Am              | Am              | Sm              | -              |
| APSIM-wheat       | Am              | Am, Ax, An    | Am                | -           | Am              | -                  | Am, Af     | Am            | Am              | Am              | Sm              | -              |
| AQUACROP          | Am              | -             | -                 | -           | Am <sup>1</sup> | -                  | Am         | Ax, An        | Am              | -               | Am              | -              |
| CropSyst          | Am              | Am            | Am                | -           | -               | Cm                 | Am, Ae, Af | Ah            | -               | -               | -               | Ah             |
| DAISY             | Sm, Am          | Am            | Am                | Am          | Am              | -                  | -          | Am            | Am              | Am              | Sm              | -              |
| DSSAT-CERES       | Am              | Am            | Am                | -           | Am              | -                  | Am         | Am            | Am              | Am              | Am              | -              |
| DSSAT-CROPSIM     | Am              | Am            | Am                | -           | Am              | -                  | Am         | Am            | Am              | Am              | Sm              | -              |
| EPIC              | Am              | -             | Am                | Am          | Am              | -                  | Am, An     | -             | Am              | Am              | Sm              | -              |
| Expert-N – CERES  | Cm, Ae, Af      | Ax, Cm, An    | Ax, An            | -           | Am              | Ax, An             | -          | -             | Ax, Am, An      | Ax, Am, An      | Cm              | -              |
| Expert-N – GECROS | Cx, Cn          | Ax, An        | Cx, Cn            | Am          | -               | Ax, An             | -          | -             | -               | -               | -               | -              |
| Expert-N – SPASS  | Ax, An          | Ax, An        | Ax, An            | Am          | -               | -                  | Am         | -             | -               | Am              | Sm              | -              |
| Expert-N – SUCROS | Ax, An          | -             | Ax, An            | Am          | -               | -                  | Am         | -             | -               | -               | Ax, An          | -              |
| FASSET            | Am              | Am            | Am                | -           | Am              | -                  | Am         | Am            | Am              | Am              | Sm              | -              |
| GLAM              | Am              | -             | -                 | -           | -               | -                  | Ax         | Am            | -               | -               | -               | -              |
| HERMES            | Am              | Am            | Am                | Am          | -               | -                  | Am         | -             | Am              | -               | Am              | -              |
| INFOCROP          | Ah <sup>2</sup> | -             | Am                | -           | Ah <sup>3</sup> | -                  | Am, Af     | Ax, An        | Am <sup>4</sup> | Am <sup>4</sup> | -               | -              |
| LINTUL            | Am              | -             | Am, An            | -           | -               | -                  | Am         | -             | -               | -               | -               | -              |
| LOBELL            | -               | -             | -                 | -           | -               | -                  | -          | -             | -               | -               | -               | -              |
| LPJmL             | Am              | Am            | Am                | Am, Sm      | Am              | Am                 | Am         | <sup>-5</sup> | <sup>-5</sup>   | -               | Am <sup>6</sup> | -              |
| MCWLA-Wheat       | Am              | Am            | Am                | Am          | Am              | -                  | Am, Ae     | Am, Ae        | Am              | -               | Am              | -              |

|              |            |        |    |           |               |    |            |           |               |    |    |   |
|--------------|------------|--------|----|-----------|---------------|----|------------|-----------|---------------|----|----|---|
| MONICA       | Sm, Am     | Am     | Am | Ax,<br>An | -             | -  | Am         | -         | -             | -  | Am | - |
| OLEARY       | Am         | -      | Am | -         | -             | -  | Am         | -         | Am            | -  | Am | - |
| SALUS        | Am         | Am     | Am | -         | Am            | -  | Am, Ae, Af | Am        | Am            | Am | Sm | - |
| SIMPLACE     | Am         | Am     | -  | -         | Am            | -  | Am         | Ax,<br>Ae | -             | -  | -  | - |
| SIRIUS       | Ah, Ch, Sh | Sh     | Ah | -         | Ah, Ch,<br>Sh | Ah | Ah, Ch     | Ch        | Ch            | Ch | Sh | - |
| SirusQuality | Sm, Cm     | Sm, Cm | Cm | -         | Cm            | Cm | Cm         | Cm        | Cm            | Cm | Am | - |
| STICS        | Cm         | Cm     | Cm | -         | Cm            | -  | Cm, Cf     | Cm        | Cx, Cn,<br>Ce | -  | -  | - |
| WHEATGROW    | Am         | Am     | Am | Am        | Am            | -  | Am, Ae     | Am        | Am            | Am | Am | - |
| WOFOST       | Am         | -      | Am | Am        | Am            | -  | Am         | -         | Am            | -  | Am | - |

Temperature:

A – Air

C – Canopy

S – Soil

Suffix:

m – daily mean

x – daily maximum

n – daily minimum

h – hourly

e – daily extreme maximum (>34 °C)

f – daily frost (<2°C)

40 <sup>1</sup>Canopy growth; <sup>2</sup>Ah is interpolated from daily minimum and maximum temperatures; <sup>3</sup>for initial growth and later dependent on biomass growth; <sup>4</sup>also biomass  
41 dependent; <sup>5</sup>The processes of grain set and growth is not modeled but only the carbon pool for the storage organs which is affected by air temperature; <sup>6</sup>Temperature  
42 effects on the equilibrium evapotranspiration rate affect water stress (the ratio between calculations of atmospheric water demand and crop water supply), and thus plant  
43 root growth.

44

45

46 *CIMMYT data*

47 The second set was the International Heat Stress Genotype Experiment (IHSGE) carried out by  
48 CIMMYT that included seven temperature environments, including time-of-sowing treatments<sup>73</sup>.  
49 These experimental data were also not publicly available and could therefore be used in a blind  
50 test.

51 The International Heat Stress Genotype Experiment was a 4-year collaboration between  
52 CIMMYT and key national agricultural research system partners to identify important  
53 physiological traits that have value as predictors of yield at high temperatures<sup>73</sup>. Experimental  
54 locations were selected based on a classification of temperature and humidity during the wheat  
55 growing cycle. “Hot” and “very hot” locations were defined as having mean temperatures above  
56 17.5 and 22.5°C, respectively, during the coolest month. “Dry” and “Humid” locations were  
57 defined as having mean vapor pressure deficits above and below 1.0 kPa, respectively. The  
58 present study used data from seven of the original 12 locations to represent a range of  
59 temperatures (locations are included in Table S3). At Obregon and Tlaltizapan, Mexico normal  
60 and late sowing dates were used to provide contrasting temperature regimes at the same location.  
61 Of the sixteen genotypes originally included in the experiment, two were selected for the present  
62 study (cv Bacanora 88 and Nesser), which had low photoperiod sensitivity and low vernalization  
63 requirements. These two cultivars were selected for their low photoperiod sensitivity and low  
64 vernalization requirements to be comparable with the low to no vernalization requirements and  
65 photoperiod sensitivity of cv Yecora Rojo in the HSC experiment. Variables measured in the  
66 experiment included plants/m<sup>2</sup>, biomass at 50% anthesis, days to 50% anthesis, days to  
67 physiological maturity, final biomass, grain yield, spikes/m<sup>2</sup>, grains/spike, and kernel weight at  
68 maturity. Maturity dates for the late sown treatments for both cultivars at Tlaltizapan, Mexico  
69 were not available and therefore calculated using the average growing degree days from anthesis  
70 to maturity of all other treatments as an estimate.

71 All experiments were well watered and fertilized with temperature being the most important  
72 variable. Model inter-comparison was carried out using standardized protocols and one step of  
73 calibration. All sowing dates, anthesis and maturity dates, soil type characteristics and weather  
74 data were supplied to the modelers to simulate the CIMMYT experiments, but all other  
75 measurements were held back (blind).

76

77 *Simulation outputs*

78 The total-growing-season simulation outputs included: grain yield (t/ha), grains/m<sup>2</sup>, kernel  
79 weight, above-ground biomass at maturity (t/ha), anthesis date and maturity date.

80

81 *Data analysis*

82 The root mean square relative error (RMSRE) between observed and simulated yield is  
83 calculated as:

84 
$$\text{RMSRE}_m = 100 \times \sqrt{\frac{1}{N} \sum_{i=1}^N \left( \frac{y_i - \hat{y}_{m,i}}{y_i} \right)^2} \quad (1)$$

85 where  $y_i$  is the observed value of the  $i$ th measured treatment,  $\hat{y}_{m,i}$  is the corresponding value  
86 simulated by model  $m$ , and  $N$  is the total number of treatments.

87 The coefficient of variation (CV%) of  $x$  represents the variation between models, calculated as:

88 
$$\text{CV}\% = \frac{\sigma}{\bar{x}} * 100 \quad (2)$$

89 where  $\sigma$  is the standard deviation of the variable ( $x$ ), e.g. across models and  $\bar{x}$  is their average.

90 The relative grain yield change in Fig. 1g and 3b was calculated as:

91 
$$r_k = \frac{\bar{y}_{\text{future},k} - \bar{y}_{\text{baseline},k}}{\bar{y}_{\text{baseline},k}} * 100 \quad (3)$$

92 The box and whisker plots show the distributions. The horizontal line in each box represents the  
93 median response, the box delimits the 25<sup>th</sup> to 75<sup>th</sup> percentiles, and the whiskers extend from the  
94 10<sup>th</sup> to the 90<sup>th</sup> percentile (Standard method). The Standard method uses a linear interpolation to  
95 determine the percentile values using the following approach; the data are sorted in increasing  
96 order from  $x_1, x_2, \dots, x_n$ , then a parameter  $i$  is calculated as:

97 
$$i = \frac{N * p_i}{100} + 0.5 \quad (4)$$

98 where  $N$  is the total number of observations and  $p_i$  is a given percentile value. If the value of  $i$  is  
 99 an integer then the corresponding data point  $x_i$  is the percentile.  $k$  is the largest integer less than  
 100  $i$ , and  $f=i-k$ .

101 The percentile value ( $v$ ) is then calculated as:

102 
$$v = f * x_{k+1} + (1 - f) * x_k \quad (5)$$

103 We calculated the variability of yield due to year, model or location in the global impact  
 104 assessment. Consider variability due to year (an equivalent procedure was used for variability  
 105 due to model and location). First, we calculated the standard deviation of yield over years, for  
 106 each combination of model and location, giving 900 standard deviations:

107 
$$\sigma_{i,j}^{(Year)} = \sqrt{\text{var}(Y | M_i, L_j)} \quad i = 1, \dots, 30 \quad j = 1, \dots, 30 \quad (6)$$

108 where  $Y$  is yield and the notation  $Y | M_i, L_j$  means yield for model  $M_i$  and location  $L_j$ . There  
 109 are 30 values of  $Y | M_i, L_j$  for each  $M_i$  and  $L_j$  since there are 30 years. The standard deviation  
 110 above is the standard deviation over the 30 years. We then normalized those standard deviations  
 111 by dividing by overall average yield,  $\bar{Y}$ , giving 900 coefficients of variation:

112 
$$CV(\%)_{i,j}^{(Year)} = \frac{\sigma_{i,j}^{(Year)}}{\bar{Y}} * 100 \quad i = 1, \dots, 30 \quad j = 1, \dots, 30 \quad (7)$$

113 The box plots in Figure 3a for each temperature represent those 900 CV values.

114

115 *Calibration steps for each model for HSC experiment*

116 The simulations were carried out by individual modelers in a ‘blind’ test (individual replicates  
 117 were previously not publicly available (therefore called a “blind” analysis)) following AgMIP  
 118 protocols<sup>1</sup>. Modelers had access to phenology and yield information of one treatment only (a  
 119 treatment in the normal temperature range). Modelers could use this information to calibrate the



120 cultivar (cv. Yecora for HSC experiment). For all other treatments, phenology, growth, LAI,  
121 yield and yield components were not made available. All presented simulations were carried out  
122 with these calibrated simulations. Only in a special exercise summarized in Table S4 and Figure  
123 S4, different levels of information was made available to analyze the impact of information  
124 availability on the model simulation results. Four steps with different levels of available  
125 information for model calibrations were carried out. Note, cultivar Yecora Rojo was used in all  
126 treatments in the HSC experiment for this special analysis.

127 A- Blind test: without calibration (modelers were supplied with daily weather data, crop  
128 management, qualitative information on cultivar (rating of photoperiod sensitivity and  
129 vernalization requirements), anthesis date and maturity date for one normal sowing date  
130 treatment).

131 B- Blind test with calibrated phenology: In addition to “A”, anthesis and maturity dates were  
132 supplied for all treatments to allow phenology calibration for the single cultivar used across all  
133 treatments.

134 C- Blind test with fixed phenology: Modelers were asked to fix their simulations to observed  
135 phenology across all treatments (i.e. simulated phenology errors were excluded).

136 D- Blind test with calibrated highest yield (normal temperature range): In addition to “A” and  
137 “B”, yield data for one treatment (normal temperature range with highest yield treatment was  
138 supplied. Models were allowed to be calibrated against yield data from one treatment only.

139 Blind test with calibrated highest yield (step D) was also applied to the CIMMYT data for each  
140 of the two cultivars. Models were allowed to be calibrated against anthesis and maturity dates  
141 and yield data from one treatment per cultivar only.

142 The individual model changes for each of these steps are shown in Supplementary Appendix  
143 Table SA1.

144

145

146 *Climate series*

147 Historical climate data were drawn from the AgCFSR climate dataset  
148 (<http://data.giss.nasa.gov/impacts/agmipcf/>). AgCFSR combines retrospective analyses, gridded  
149 meteorological station datasets, and remotely-sensed radiation and precipitation information to  
150 form a coherent daily time series with all variables needed for agricultural modeling. 1981-2010  
151 temperature trends in AgCFSR are a manifestation of the gridded meteorological station datasets  
152 to which monthly values are pegged, and may therefore have slight positive or negative biases  
153 due to inconsistencies in station coverage and data availability over the period analyzed. The +2  
154 and +4 °C scenarios were created by adjusting each day's maximum and minimum temperatures  
155 upward by that amount and then adjusting vapor pressures and related parameters to maintain the  
156 original relative humidity at the maximum temperature time of day.

157

158 *Calculation of seasonal mean temperature*

159 Seasonal mean air temperature used in Figure 1 was calculated from daily air temperature ( $T_t$ ),  
160 which was derived from the sum of eight contributions of a cosine variation between maximum  
161 and minimum daily air temperatures<sup>74</sup>.

162 
$$T_t = \frac{1}{8} \sum_{r=1}^{r=8} (T_h - T_b) \quad (8)$$

163 with

164 
$$T_h(r) = T_{\min} + f_r (T_{\max} - T_{\min}) \quad (9)$$

165 and

166 
$$f_r = \frac{1}{2} \left( 1 + \cos \frac{90}{8} (2r - 1) \right) \quad (10)$$

167 where  $r$  is an index for a particular 3-h period,  $T_b$  ( $^{\circ}\text{C}$ ) is the base temperature ( $0^{\circ}\text{C}$ ) and  $T_h$   
168 ( $^{\circ}\text{C}$ ) is the calculated three hour temperature contribution to estimated daily mean temperature.  
169 Negative contributions of  $T_h$  were treated as zero.

170

### 171 *Global temperature impact assessment*

172 Thirty locations from key wheat growing regions in the world, including the field experimental  
173 sites of the CIMMYT experiment, were used for a global temperature impact assessment (Table  
174 S3). These 30 locations were chosen from representative wheat growing regions with irrigated or  
175 high rainfall wheat (simulated with no water or N limitations) representing about 70% of current  
176 global wheat production<sup>75</sup>. To carry out the global temperature impact assessment, with  
177 exclusive focus on temperature, region-specific cultivars were used. Observed local mean  
178 sowing, anthesis and maturity dates were supplied with qualitative information on vernalization  
179 requirements and photoperiod sensitivity for each cultivar and modelers were asked to sow at the  
180 supplied sowing dates and calibrate their cultivar parameters against the observed anthesis and  
181 maturity dates by considering the qualitative information on vernalization requirements and  
182 photoperiod sensitivity. All model simulations were executed by the individual modeling groups.

183

### 184 *Impact of temperature trend*

185 Temperature trends (growing season mean temperature) were calculated based on 30 years  
186 (1981-2010; Fig. S1) for each of the 30 global locations (Table S3, Fig. S1). The first eight  
187 locations in Table S3 are identical to the experimental locations of the HSC and the CIMMYT  
188 experiments. The remainder 22 locations were strategically chosen to represent irrigation and  
189 high-rainfall regions of main wheat producing regions.

190 For the yield trend calculation, the 30-model ensemble median yield for each year was used to  
191 calculate the linear yield trend across the 30 years per location. The yield trend per year (slope of  
192 linear regression) was multiplied by 10 for a yield trend per decade, and expressed as a percent-

193 change by dividing the trend by the mean yield across the 30-year period and multiplying by  
 194 100.

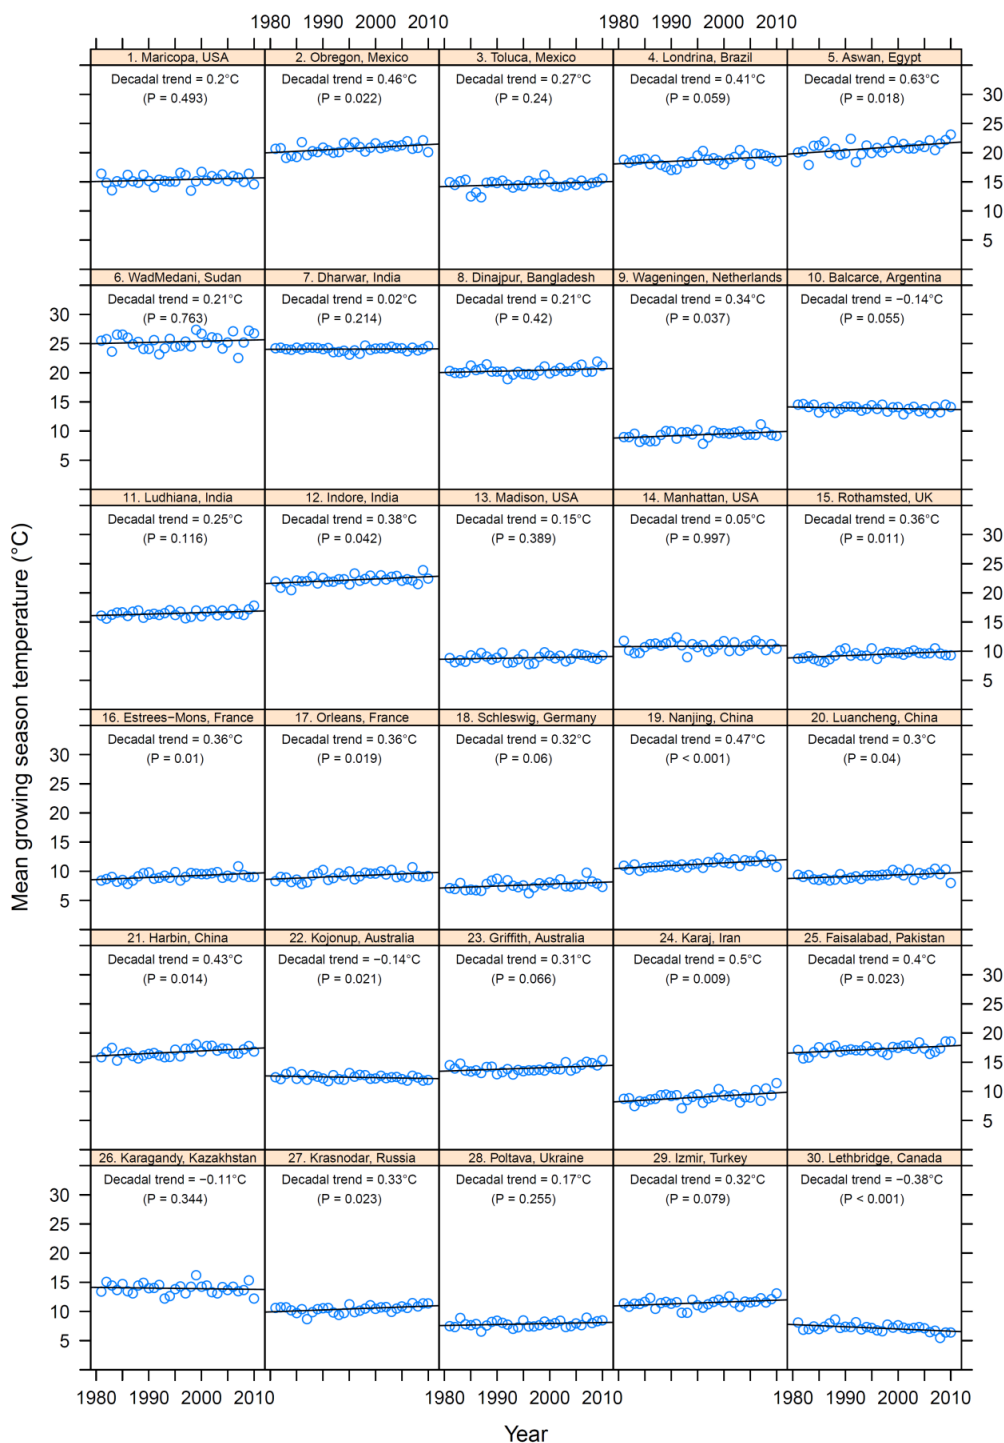

195  
 196 **Supplementary Fig. S1.** Measured growing season mean temperatures from 1981-2010 for each of the  
 197 30 global locations (Table S3) with linear trend line.

198 *Disaggregating global temperature increase to regional temperature changes and extrapolating*  
199 *to global wheat production*

200

201 Local grain yield impacts were expressed as an impact per °C local temperature change based on  
202 the +2°C impact simulations. Global temperature increase (mean global temperature change) was  
203 disaggregated to regional temperature changes (Table S3, last column) via Figure 12-10 from the  
204 IPCC 2013 WG1 Report<sup>76</sup> as local temperature changes can be different to the global mean  
205 temperature change<sup>76</sup> (Table S3). The disaggregated local temperature changes per °C global  
206 mean temperature was then used to calculate the local temperature impact on grain yield and  
207 expressed as “grain yield impact per °C global mean temperature change”.

208 The global wheat production impact was calculated using the following steps:

209 1) calculating the relative simulated mean yield impact for +2 °C of the 30 years (1981-2010) per  
210 single model at each location,

211 2) calculating the absolute regional production loss per single model by multiplying the relative  
212 yield loss from this model with the production represented at each location (using FAO country  
213 wheat production statistics of 2012 ([www.fao.org](http://www.fao.org))) and by multiplying with the specific local  
214 temperature factor twice from Table S3 [to account for the temperature impact from the  
215 simulations being for +2 °C and the local factor being for +1 °C globally in Table S3]; this  
216 assumes that the selected simulated location is representative for the entire wheat growing region  
217 surrounding this location,

218 3) adding up all regional production losses to the total global loss per single model,

219 4) calculating the relative change in global production (global production loss divided by current  
220 global production) and then dividing this by two (to normalize the simulated +2 °C impact to an  
221 impact per +1 °C change) per single model and

222 5) calculating the median, 25 and 75%tile relative global yield impact from the 30 model  
223 ensemble.

224 When using a different order of steps by first calculating the multi-model median before  
225 aggregating to global production loss, the median global impact is the same in both approaches (-  
226 6.0%). However, in the former approach used here, the 25 and 75%tiles are closer to the median

227 (-4.2% and -8.2% compared to -3.2% and -9.2% global production loss for 25 and 75%tiles in  
 228 the latter mentioned approach, respectively).

229

230 **Supplementary Table S3a.** Locations, cultivars, growing season temperatures and local temperature  
 231 changes per 1 °C of global temperature increase from key wheat growing locations in irrigated and high  
 232 rainfall regions.

| ID # | Location -   | Country -       | Cultivar Name | Latitude Degree | Longitude Degree | Growing Season Temperature |      |         | Delta <sup>+</sup> |
|------|--------------|-----------------|---------------|-----------------|------------------|----------------------------|------|---------|--------------------|
|      |              |                 |               |                 |                  | Max                        | Min  | Average |                    |
| 1    | Maricopa     | USA             | Yecora        | 33.06           | -112.05          | 23.6                       | 7.6  | 15.6    | 1.375              |
| 2    | Obregon      | Mexico          | Tacupeto      | 27.33           | -109.9           | 29.9                       | 11.6 | 20.7    | 1.125              |
| 3    | Toluca*      | Mexico          | Tacupeto      | 19.40           | -99.68           | 21.2                       | 7.5  | 14.4    | 1.125              |
| 4    | Londrina     | Brazil          | Attila        | -23.10          | -51.13           | 25.6                       | 14.1 | 19.9    | 1.125              |
| 5    | Aswan        | Egypt           | Seri82        | 24.10           | 32.90            | 29.4                       | 13.1 | 21.3    | 1.375              |
| 6    | Wad Medani   | Sudan           | Debeira       | 14.40           | 33.50            | 35.0                       | 17.1 | 26.1    | 1.375              |
| 7    | Dharwar      | India           | Debeira       | 15.43           | 75.12            | 30.6                       | 18.2 | 24.4    | 1.000              |
| 8    | Dinajpur     | Bangladesh      | Kanchan       | 25.65           | 88.68            | 27.9                       | 14.6 | 21.2    | 1.125              |
| 9    | Wageningen   | The Netherlands | Aminda        | 51.97           | 5.63             | 13.9                       | 5.6  | 9.8     | 1.125              |
| 10   | Balcarce     | Argentina       | Oasis         | -37.75          | -58.30           | 20.3                       | 7.8  | 14.0    | 0.875              |
| 11   | Ludhiana     | India           | HD2687        | 30.90           | 75.85            | 25.9                       | 10.9 | 18.4    | 1.125              |
| 12   | Indore       | India           | HI1544        | 22.72           | 75.86            | 30.3                       | 14.3 | 22.3    | 1.125              |
| 13   | Madison      | Wisconsin, USA  | Brigadier     | 43.93           | -89.40           | 12.8                       | 1.7  | 7.3     | 1.625              |
| 14   | Manhattan    | Kansas, USA     | Fuller        | 39.14           | -96.63           | 17.9                       | 5.2  | 11.5    | 1.375              |
| 15   | Rothamsted   | UK              | Avalon        | 51.82           | -0.37            | 13.4                       | 5.8  | 9.6     | 0.625              |
| 16   | Estrées-Mons | NE France       | Bermude       | 49.88           | 3.00             | 13.1                       | 5.9  | 9.5     | 1.125              |
| 17   | Orleans      | Central France  | Apache        | 47.83           | 1.91             | 14.4                       | 5.8  | 10.1    | 1.125              |
| 18   | Schleswig    | Germany         | Dekan         | 54.53           | 9.55             | 11.0                       | 4.8  | 7.9     | 1.125              |
| 19   | Nanjing      | China           | NM13          | 32.03           | 118.48           | 16.7                       | 8.3  | 12.5    | 1.125              |
| 20   | Luancheng    | China           | SM15          | 37.53           | 114.41           | 15.7                       | 4.7  | 10.2    | 1.375              |
| 21   | Harbin       | China           | LM26          | 45.45           | 126.46           | 22.1                       | 10.8 | 16.5    | 1.375              |
| 22   | Kojonup      | Australia       | Wyll          | -33.84          | 117.15           | 18.5                       | 7.0  | 12.7    | 0.875              |
| 23   | Griffith     | Australia       | Avocet        | -34.17          | 146.03           | 20.6                       | 7.4  | 14.0    | 1.125              |
| 24   | Karaj        | Iran            | Pishtaz       | 35.91           | 50.90            | 14.7                       | 3.6  | 9.1     | 1.125              |
| 25   | Faisalabad   | Pakistan        | Faisalabad    | 31.42           | 73.12            | 26.5                       | 11.8 | 19.1    | 1.375              |
| 26   | Karagandy    | Kazakhstan      | Steklov       | 50.17           | 72.74            | 18.9                       | 5.7  | 12.3    | 1.375              |
| 27   | Krasnodar    | Russia          | Brigadier     | 45.02           | 38.95            | 15.3                       | 7.3  | 11.3    | 1.125              |
| 28   | Poltava      | Ukraine         | Brigadier     | 49.37           | 33.17            | 11.6                       | 3.3  | 7.5     | 1.125              |
| 29   | Izmir        | Turkey          | Basri         | 38.60           | 27.06            | 17.9                       | 8.3  | 13.1    | 1.125              |
| 30   | Lethbridge   | Canada          | ACR           | 49.79           | -112.83          | 11.7                       | -1.0 | 5.3     | 1.125              |

233 \*The CIMMYT experimental site used in the model-observation comparison for location #3 was Tlaltizapan, Mexico (Lat 19.68 ; Lon -99.12,  
 234 growing season mean temperature for maximum = 33.4 °C, minimum = 19.9 °C and average = 26.6 °C, about 100km north-east of Tuluca)  
 235 outside any wheat growing regions. Therefore, Tuluca, Mexico was chosen for the global impact study, as a location in a wheat growing area.

236 <sup>†</sup>Local temperature delta per location for each degree of global temperature increase after Figure 12-10 from the IPCC 2013 WG1 Report<sup>76</sup>.

237

238 **Supplementary Table S3b.** Locations, cultivars, sowing date, anthesis date and maturity date from key  
 239 spring and winter wheat growing locations in irrigated and high rainfall regions.

| ID | Location   | Country                 | Cultivar                                                                                            | Sowing date | Mean 50%-<br>anthesis<br>date<br>(+/- 1<br>week) | Mean<br>physiological<br>maturity<br>(+/- 1 week) |
|----|------------|-------------------------|-----------------------------------------------------------------------------------------------------|-------------|--------------------------------------------------|---------------------------------------------------|
| 1  | Maricopa   | USA                     | Yecora,<br>SW, no/low vernalization<br>requirement, no/low<br>photoperiod sensitive                 | 25 Dec      | 5 Apr                                            | 15 May                                            |
| 2  | Obregon    | Mexico                  | Tacupeto C2001<br>SW, low vernalization<br>requirement, low photoperiod<br>sensitive                | 1 Dec       | 15 Feb                                           | 30 Apr                                            |
| 3  | Toluca     | Mexico                  | Tacupeto C2001<br>SW, low vernalization<br>requirement, low photoperiod<br>sensitive                | 10 May      | 5 Aug                                            | 20 Sep                                            |
| 4  | Londrina   | Brazil                  | Atilla<br>SW, low-medium vernalization<br>requirement, low-medium<br>photoperiod sensitive          | 20 Apr      | 10 Jul                                           | 1 Sep                                             |
| 5  | Aswan      | Egypt                   | Seri M 82<br>SW, low-medium vernalization<br>requirement, low photoperiod<br>sensitive              | 20 Nov      | 20 Mar                                           | 30 Apr                                            |
| 6  | Wad Medani | Sudan                   | Debeira<br>SW, low/ moderate<br>vernalization requirement, low<br>photoperiod sensitive             | 20 Nov      | 25 Jan                                           | 25 Feb                                            |
| 7  | Dharwar    | India                   | Debeira<br>SW, low/moderate<br>vernalization requirement, low<br>photoperiod sensitive              | 25 Oct      | 15 Jan                                           | 25 Feb                                            |
| 8  | Dinajpur   | Bangla-<br>desh         | Kanchan<br>SW, low vernalization<br>requirement, low photoperiod<br>sensitive                       | 1 Dec       | 15 Feb                                           | 15 Mar                                            |
| 9  | Wageningen | The<br>Nether-<br>lands | Aminda,<br>WW, high vernalization<br>requirement, high<br>photoperiod sensitive                     | 5 Nov       | 25 Jun                                           | 5 Aug                                             |
| 10 | Balcarce   | Argentina               | Oasis,<br>WW, high/moderate<br>vernalization requirement,<br>high/moderate photoperiod<br>sensitive | 5 Aug       | 25 Nov                                           | 25 Dec                                            |
| 11 | Ludhiana   | India                   | HD 2687<br>SW, no/low vernalization<br>requirement, low /no                                         | 15 Nov      | 5 Feb                                            | 5 Apr                                             |

|    |              |                   |                                                                                                                                                                                                        |        |        |        |
|----|--------------|-------------------|--------------------------------------------------------------------------------------------------------------------------------------------------------------------------------------------------------|--------|--------|--------|
| 12 | Indore       | India             | photoperiod sensitive<br>HI 1544<br>SW, no/low vernalization<br>requirement, low /no<br>photoperiod sensitive                                                                                          | 25 Oct | 25 Jan | 25 Mar |
| 13 | Madison      | Wisconsin,<br>USA | Brigadier<br>WW, high vernalization<br>requirement, high<br>photoperiod sensitive                                                                                                                      | 15 Sep | 15 Jun | 30 Jul |
| 14 | Manhattan    | Kansas,<br>USA    | Fuller<br>Medium vernalization,<br>medium photoperiod<br>sensitivity                                                                                                                                   | 01 Oct | 15 May | 01 Jul |
| 15 | Rothamsted   | UK                | Avalon<br>WW<br>vernalization requirement<br>moderate/low daylength<br>photoperiod sensitive                                                                                                           | 15 Oct | 10 Jun | 20 Aug |
| 16 | Estrées-Mons | NE France         | Bermude<br>WW, high vernalization<br>requirement (score: 2/9; ca.<br>50 days)<br>- high photoperiod sensitivity<br>(score: 2/9)<br>Intermediate heading date<br>(5.5/9)<br>- TKW = 47 g (score: 6/9)   | 5 Oct  | 31 May | 15 Jul |
| 17 | Orleans      | Central<br>France | Apache<br>WW<br>High/moderate vernalization<br>requirement (score: 4/9; ca.<br>40 days)<br>Moderate photoperiod<br>sensitivity (score: 3/9)<br>- Early heading date (7/9)<br>- TKW = 42 g (score: 5/9) | 20 Oct | 25 May | 7 Jul  |
| 18 | Schleswig    | Germany           | Dekan<br>WW, low photoperiod<br>sensitivity, moderate or<br>maybe high vernalization<br>requirement                                                                                                    | 25 Sep | 15 Jun | 25 Jul |
| 19 | Nanjing      | China             | NM13<br>WW, mid- vernalization<br>requirement, moderate<br>photoperiod sensitivity                                                                                                                     | 5 Oct  | 5 May  | 5 Jun  |
| 20 | Luancheng    | China             | SM15<br>WW<br>High vernalization<br>requirement, moderate<br>photoperiod sensitivity                                                                                                                   | 5 Oct  | 5 May  | 5 Jun  |
| 21 | Harbin       | China             | LM26<br>SW<br>Very low vernalization                                                                                                                                                                   | 5 Apr  | 15 Jun | 25 Jul |



|    |            |                 |                                                                                             |         |        |         |
|----|------------|-----------------|---------------------------------------------------------------------------------------------|---------|--------|---------|
| 22 | Kojonup    | Australia       | Wyallkatchem<br>SW, low vernalization<br>requirement. Moderate<br>photoperiod sensitivity   | 15 May  | 5 Oct  | 25 Nov  |
| 23 | Griffith   | Australia       | Avocet<br>SW, low vernalization<br>requirement, moderate<br>photoperiod sensitivity         | 15 Jun  | 15 Oct | 25 Nov  |
| 24 | Karaj      | Iran            | Pishtaz,<br>SW<br>Low vernalization<br>requirement, photoperiod<br>sensitivity              | 1 Nov   | 1 May  | 20 Jun  |
| 25 | Faisalabad | Pakistan        | Faisalabad-2008<br>SW, no vernalization<br>requirement, low photoperiod<br>sensitivity      | 15 Nov  | 5 Mar  | 5 Apr   |
| 26 | Karagandy  | Kazakh-<br>stan | Steklov.-24<br>SW, Low vernalization<br>requirement, medium<br>photoperiod sensitivity      | 20 May  | 1 Aug  | 15 Sep  |
| 27 | Krasnodar  | Russia          | Brigadier<br>WW, high vernalization<br>requirement, high<br>photoperiod sensitive           | 15 Sep  | 20 May | 10 Jul  |
| 28 | Poltava    | Ukraine         | Brigadier<br>WW, high vernalization<br>requirement, high<br>photoperiod sensitive           | 15 Sep  | 20 May | 15 Jul  |
| 29 | Izmir      | Turkey          | Basri Bey<br>SW, SW, medium vernalization<br>requirement, medium<br>photoperiod sensitivity | 15 Nov  | 1 May  | 1 June  |
| 30 | Lethbridge | Canada          | ACR<br>WW, high vernalization<br>requirement, high<br>photoperiod sensitive                 | 10 Sept | 10 Jun | 25 July |

240

241

242

243

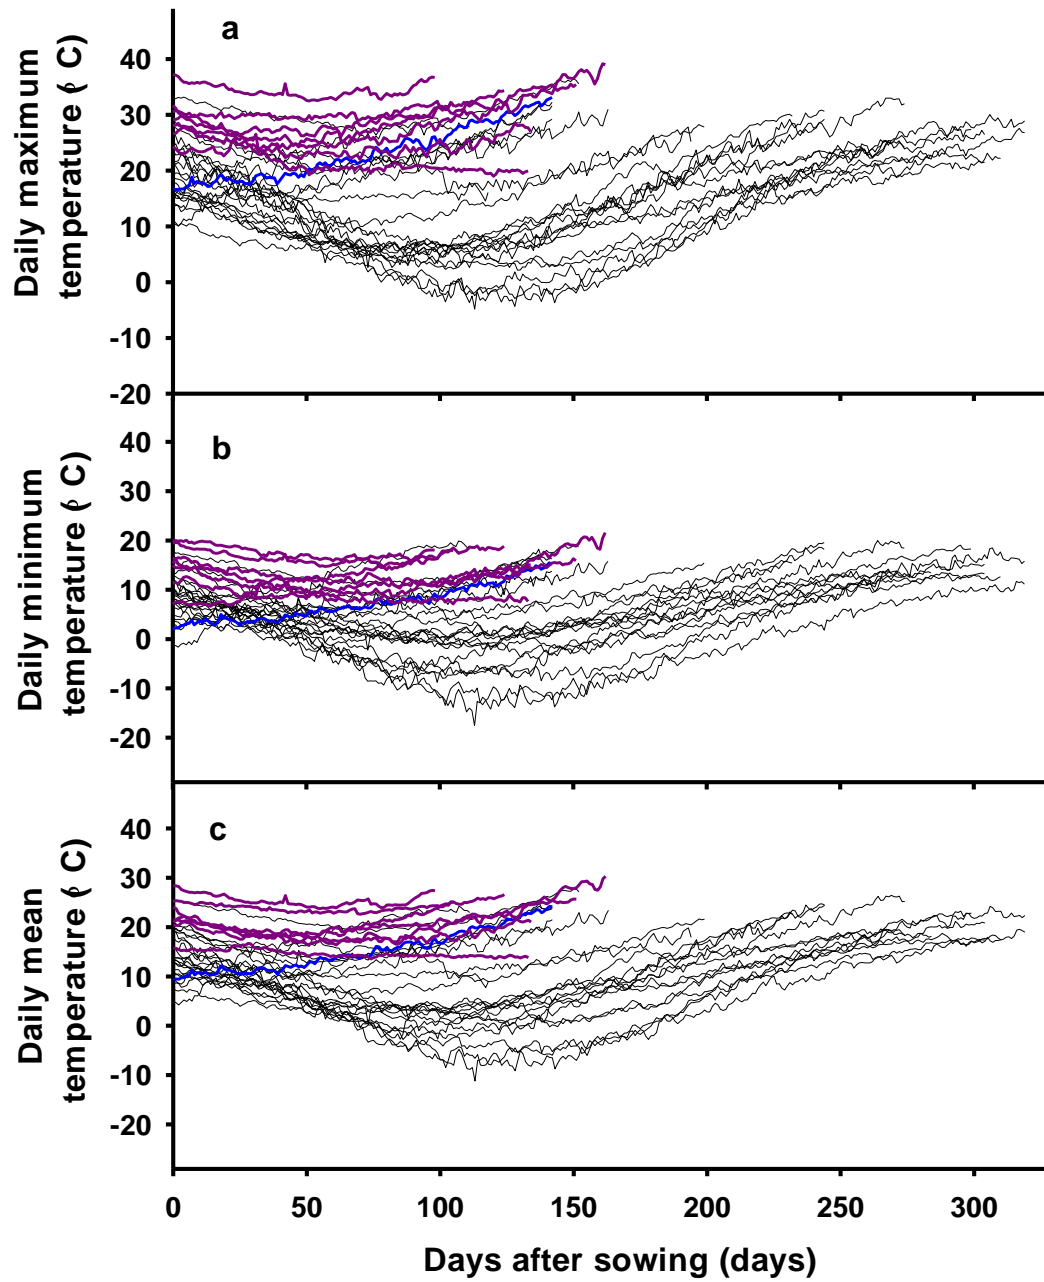

245

246 **Supplementary Fig. S2.** Daily 30-year averages (1981-2010) from sowing date to mean maturity dates  
 247 for (a)  $T_{\max}$ , (b)  $T_{\min}$  and (c) mean temperatures. Maricopa (blue), seven CIMMYT locations (purple) and  
 248 all other locations (black).

249

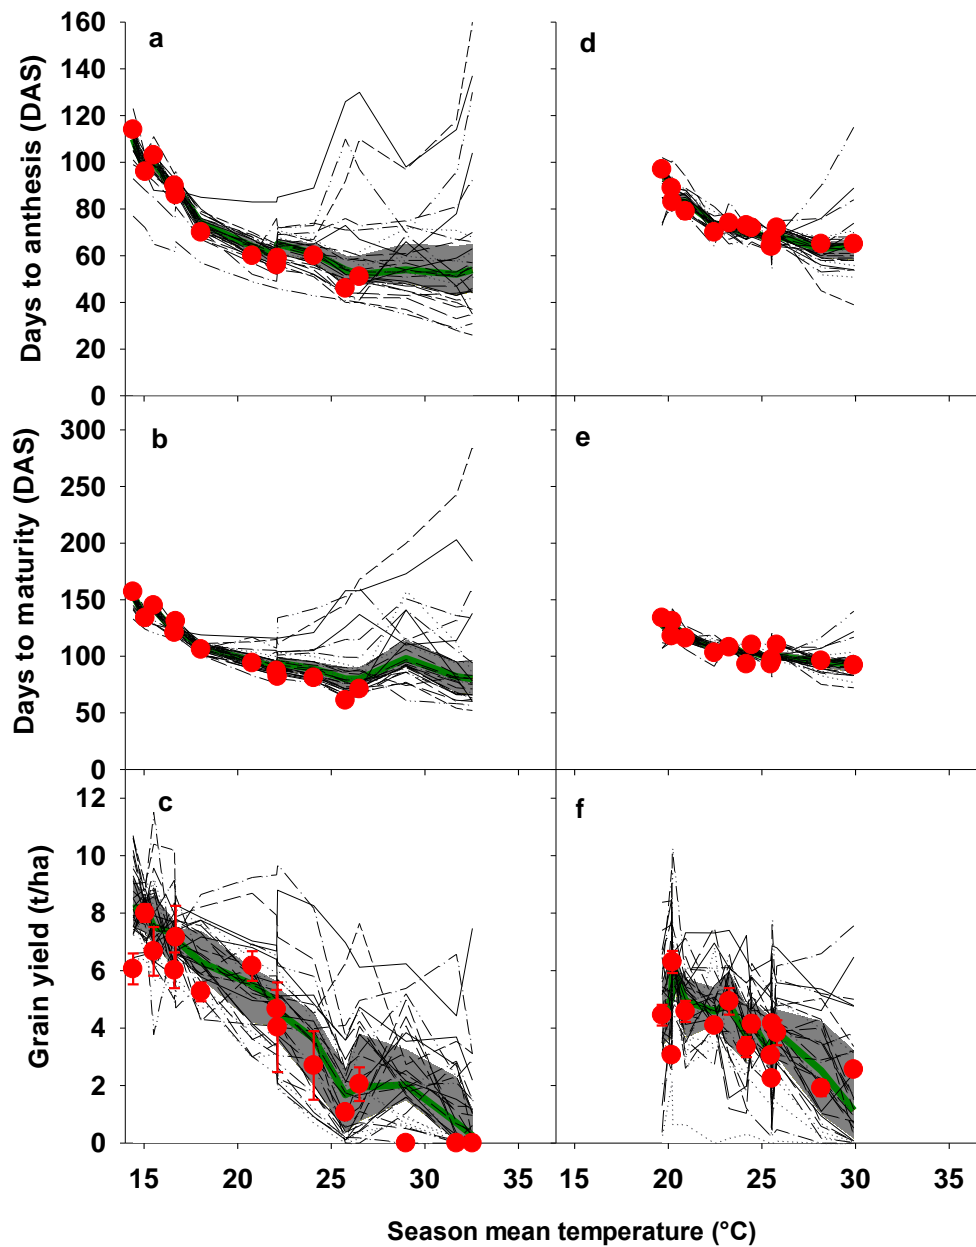

251

252 **Supplementary Fig. S3.** (a to f) Observed values  $\pm$  1 standard deviation (s.d.) are shown by red symbols  
 253 with 30 simulated values shown by black lines (step D - calibrated highest yield). (a to c) Hot-Serial-  
 254 Cereal experiment on *Triticum aestivum* L. cultivar Yecora Rojo with days-after-sowing (DAS), time-of-  
 255 sowing and infrared heat treatments. (d to f) CIMMYT multi-environment temperature experiments on *T.*  
 256 *aestivum* L. cultivar Bacanora with time-of-sowing treatments. Multi-model ensemble medians are shown  
 257 by green lines. Intervals between the 25<sup>th</sup> and 75<sup>th</sup> percentiles are shaded gray. Error bars are not shown  
 258 when smaller than symbol.

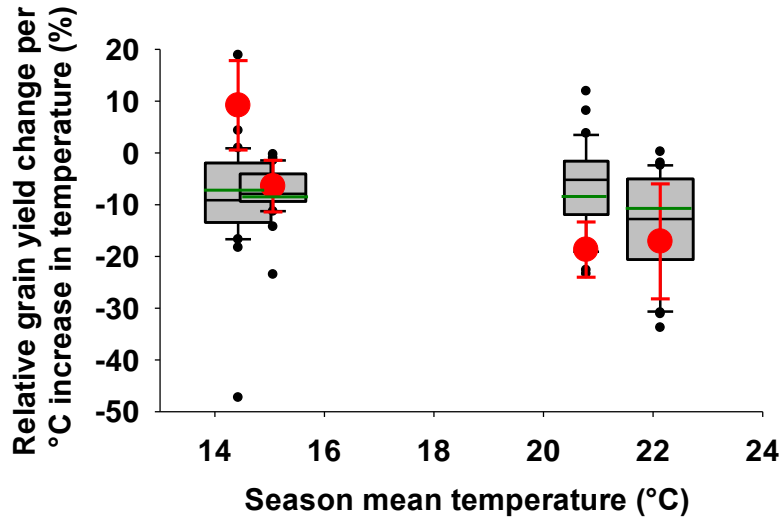

259

260

261 **Supplementary Fig. S4.** Relative grain yield change per °C temperature increase due to infrared heating  
 262 for four treatments. Observed values  $\pm$  1 s.d. are shown by red symbols. Simulated outputs of 30 models  
 263 are shown by box plots, where horizontal lines represent, from top to bottom, the 10<sup>th</sup> percentile, 25<sup>th</sup>  
 264 percentile, median, 75<sup>th</sup> percentile and 90<sup>th</sup> percentile, and dots represent outliers.

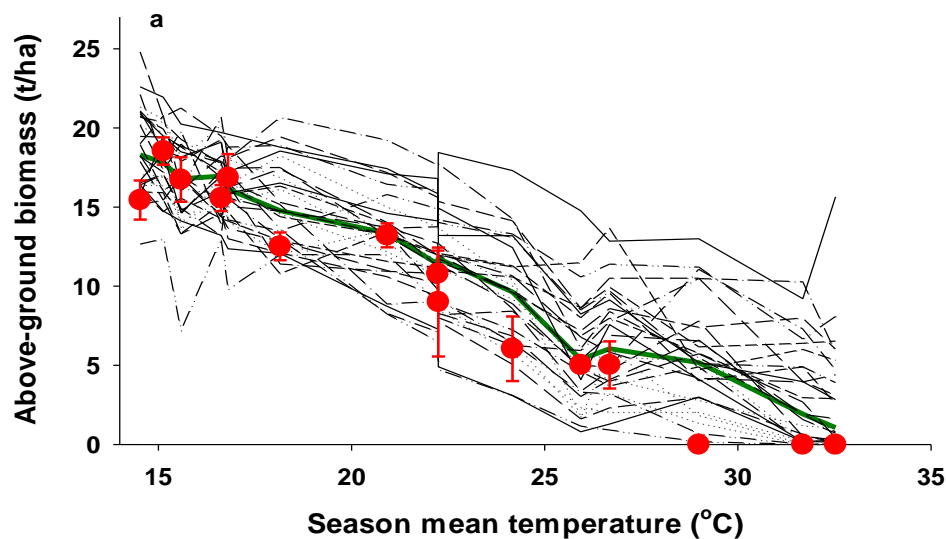

265

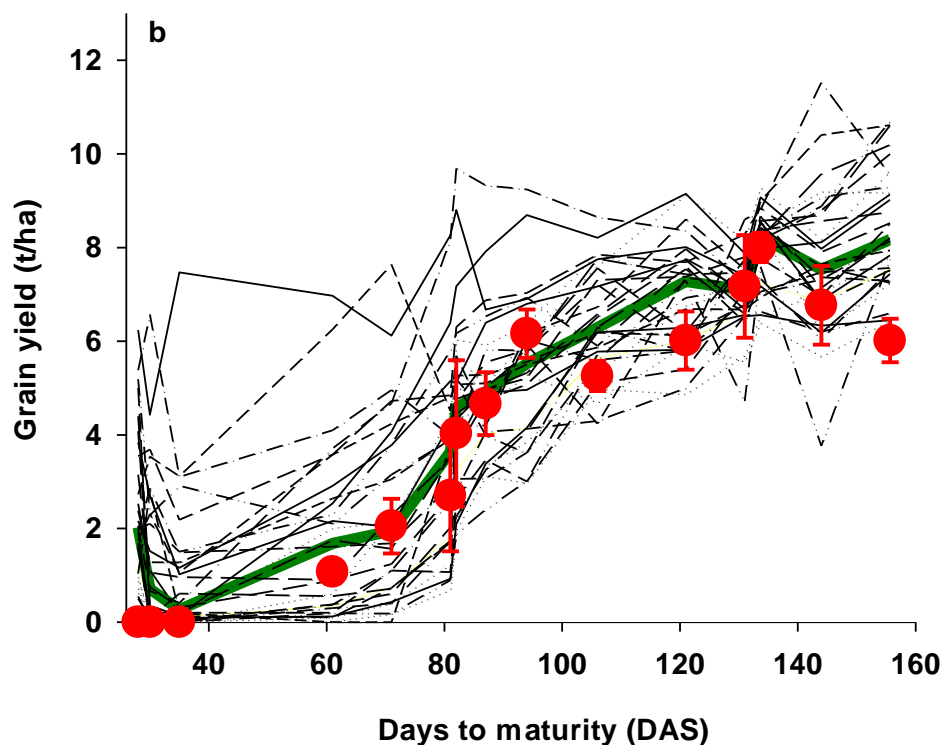

266

267 **Supplementary Fig. S5.** Observed mean (red circle) and 1 s.d. (red error bars) and simulated (black  
 268 lines) (calibrated for highest yield treatment (step D)) for (a) above-ground biomass at maturity over  
 269 mean season temperature and (b) grain yield over days to maturity of the Hot-Serial Cereal experiment  
 270 for sowing dates and artificial heating. Note, the three dates with <40 days to maturity are the recorded  
 271 dates of premature crop death with seasonal mean temperature >28 °C, with no recorded biomass and  
 272 recorded zero grain yields. Multi-model ensemble median (green line) is shown. Space between 25<sup>th</sup>  
 273 percentile and 75<sup>th</sup> percentile is shaded grey. Error bars are not shown when smaller than symbol.

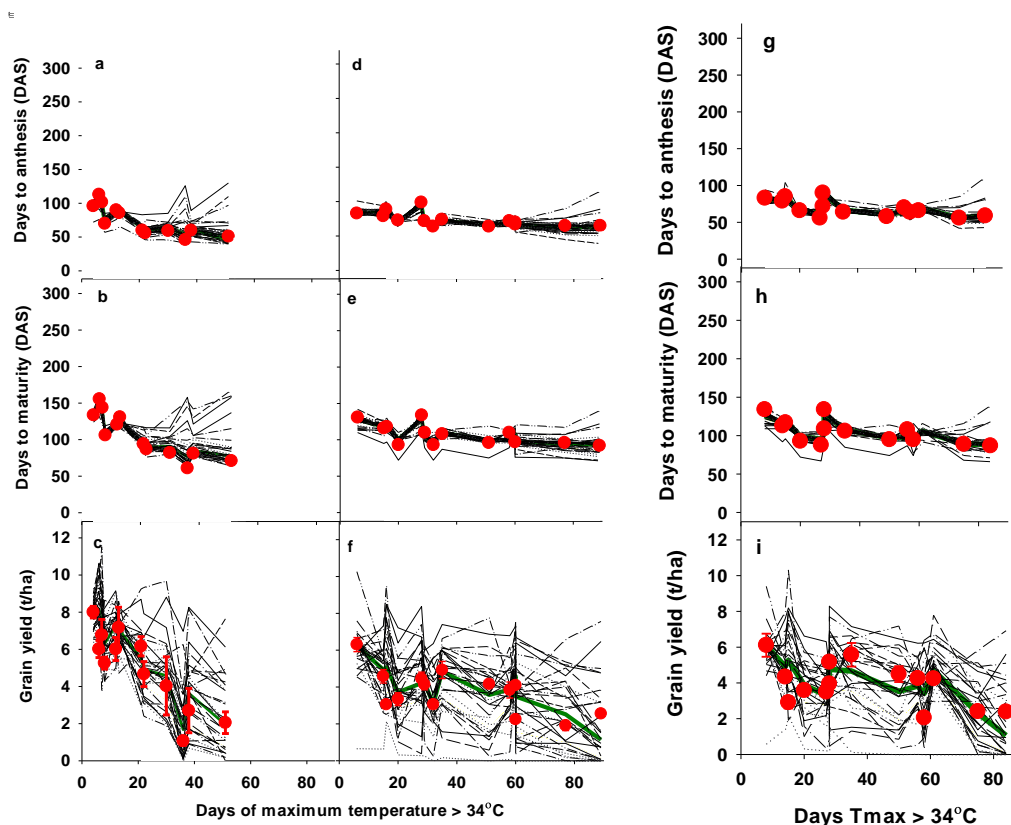

275

276 **Supplementary Fig. S6.** Observed (red symbols +/- 1 s.d.) and 30 simulated (black lines) (calibrated  
 277 highest yield treatment (step D)) for a Hot-Serial-Cereal experiment (cultivar Yecora Rojo) with time-of-  
 278 sowing and infra-red heating treatments for (a) days to anthesis, (b) days to maturity and (c) grain yields.  
 279 Multi-temperature environment experiments from CIMMYT, including time-of-sowing treatments for  
 280 cultivar Bacanora: (d) days to anthesis, (e) days to maturity and (f) grain yields and for cultivar Nesser:  
 281 (g) days to anthesis, (h) days to maturity and (i) grain yields. Multi-model ensemble median (green line)  
 282 is shown. Space between 25<sup>th</sup> percentile and 75<sup>th</sup> percentile is shaded grey. Error bars are not shown when  
 283 smaller than symbol.

284

285

286

287

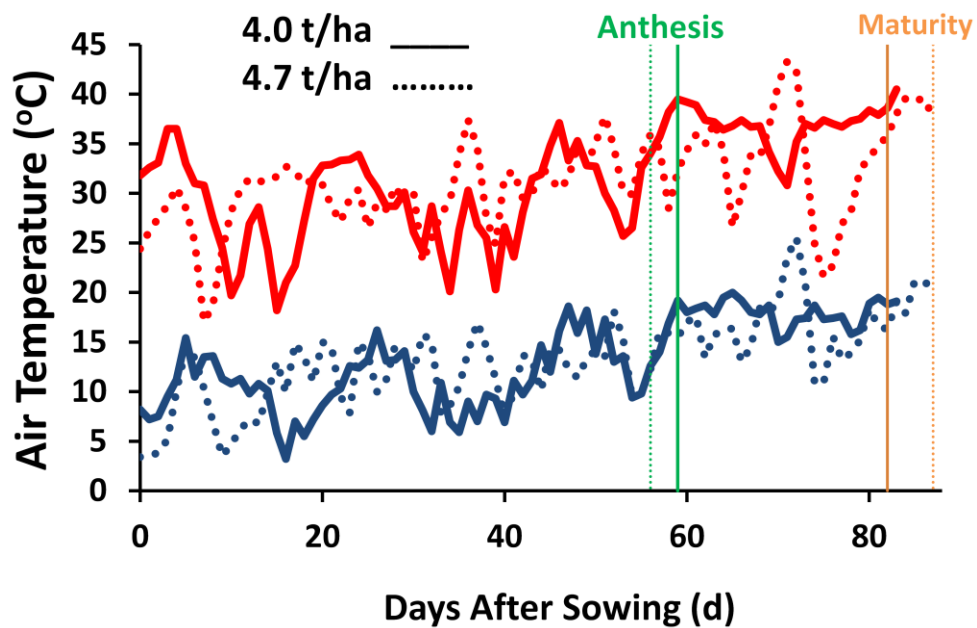

288  
 289 **Supplementary Fig. S7.** Measured daily temperatures ( $T_{\max}$  in red and  $T_{\min}$  in blue) for same mean  
 290 seasonal temperature resulting in two different grain yields (4.7t/ha season \_\_\_\_ and 4.0 t/ha season - - - )  
 291 of the Hot-Serial Cereal experiment. Anthesis and maturity dates are indicated with vertical lines.

292  
 293  
 294  
 295  
 296  
 297  
 298

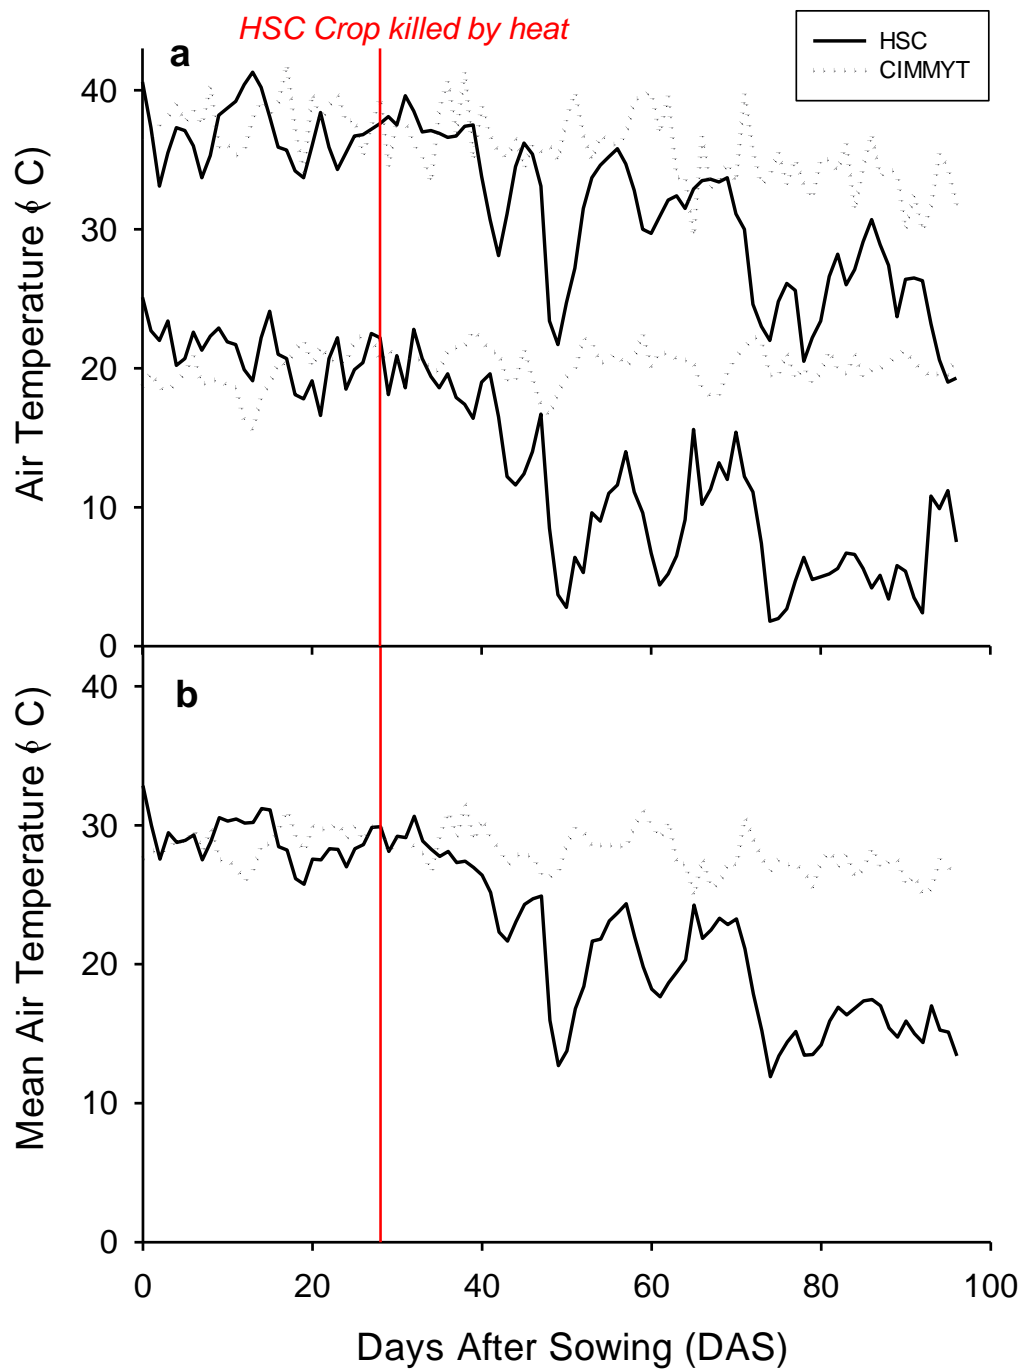

299

300 **Supplementary Fig. S8.** (a) Maximum and minimum and (b) mean daily temperatures for same growing  
 301 season mean temperature of 28 °C for a Hot-Serial Cereal (HSC) experiment treatment with cv Yecora  
 302 Rojo (growing season from sowing to pre-mature crop death at 28 days after sowing) and CIMMYT  
 303 treatment with cv Bacanora (growing season from sowing to crop maturity at 96 days after sowing). Red  
 304 vertical line indicates pre-mature death of crop in HSC treatment.



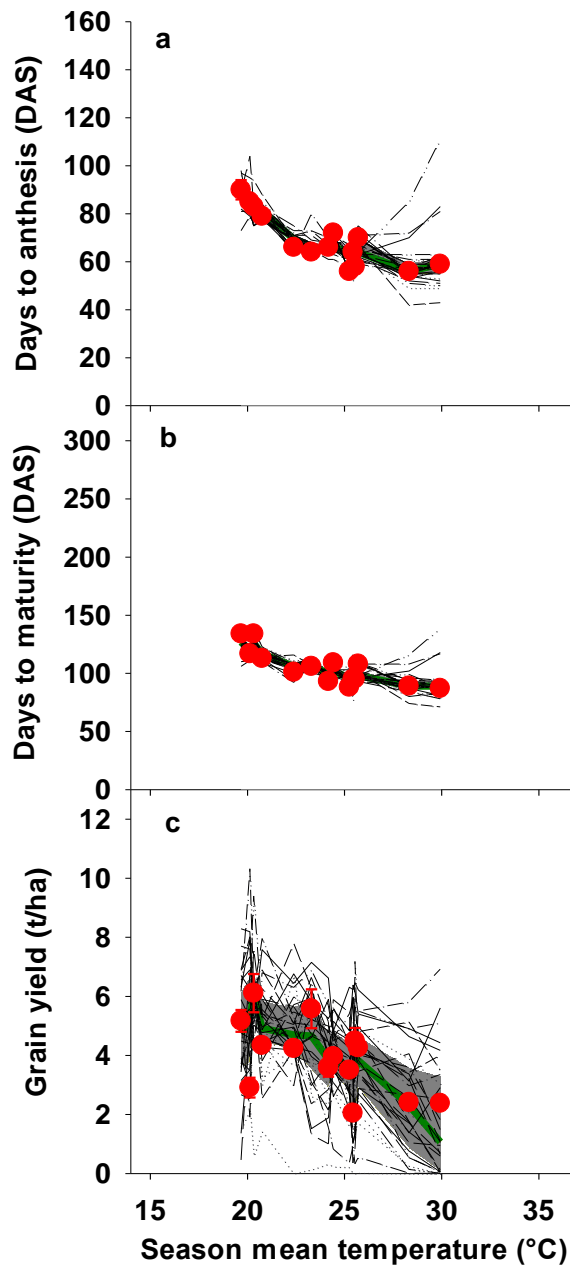

305

306 **Supplementary Fig. S9.** Observed (red symbols +/- 1 s.d.) and 30 simulated (black lines) for multi-  
 307 temperature environment experiments from CIMMYT experiment (cultivar Nesser), including time-of-  
 308 sowing treatments for (a) days to anthesis, (b) days to maturity and (c) grain yields. Multi-model  
 309 ensemble median (green line) is shown. Space between 25<sup>th</sup> percentile and 75<sup>th</sup> percentile is shaded grey.  
 310 Error bars are not shown when smaller than symbol.

311

312 **Supplementary Table S4.** Root Mean Square Relative Error (RMSRE %) of 30 crop simulation models  
 313 grouped in quartiles (shown in red shades with quartile boundaries supplied in table above red shades) for  
 314 simulated anthesis and maturity dates, and grain yields for **HSC** experiment: A- no calibration (Blind  
 315 test), B- calibrated cultivar parameters across phenology dates (Calibrated phenology), C - fixed to  
 316 observed phenology (i.e. simulated phenology errors excluded) (Fixed phenology), and D- calibrated  
 317 cultivar for phenology and yield for highest observed yield treatment (Calibrated with highest observed  
 318 yield).

| Percentiles / ensemble | RMSRE (%)        |    |   |    |                  |    |   |    |             |     |    |     |
|------------------------|------------------|----|---|----|------------------|----|---|----|-------------|-----|----|-----|
|                        | Days to anthesis |    |   |    | Days to maturity |    |   |    | Grain yield |     |    |     |
|                        | A                | B  | C | D  | A                | B  | C | D  | A           | B   | C  | D   |
| 0%                     | 4                | 3  | 0 | 3  | 4                | 3  | 0 | 3  | 20          | 21  | 21 | 24  |
| 25%                    | 8                | 7  | 0 | 7  | 9                | 6  | 0 | 6  | 34          | 35  | 31 | 33  |
| 50%                    | 13               | 9  | 0 | 10 | 13               | 11 | 0 | 10 | 48          | 45  | 44 | 44  |
| 75%                    | 18               | 14 | 0 | 15 | 29               | 18 | 1 | 18 | 55          | 55  | 53 | 63  |
| 100%                   | 73               | 73 | 2 | 73 | 75               | 64 | 5 | 64 | 112         | 166 | 92 | 184 |
| e.median               | 8                | 7  | 0 | 7  | 12               | 10 | 0 | 11 | 11          | 14  | 21 | 24  |

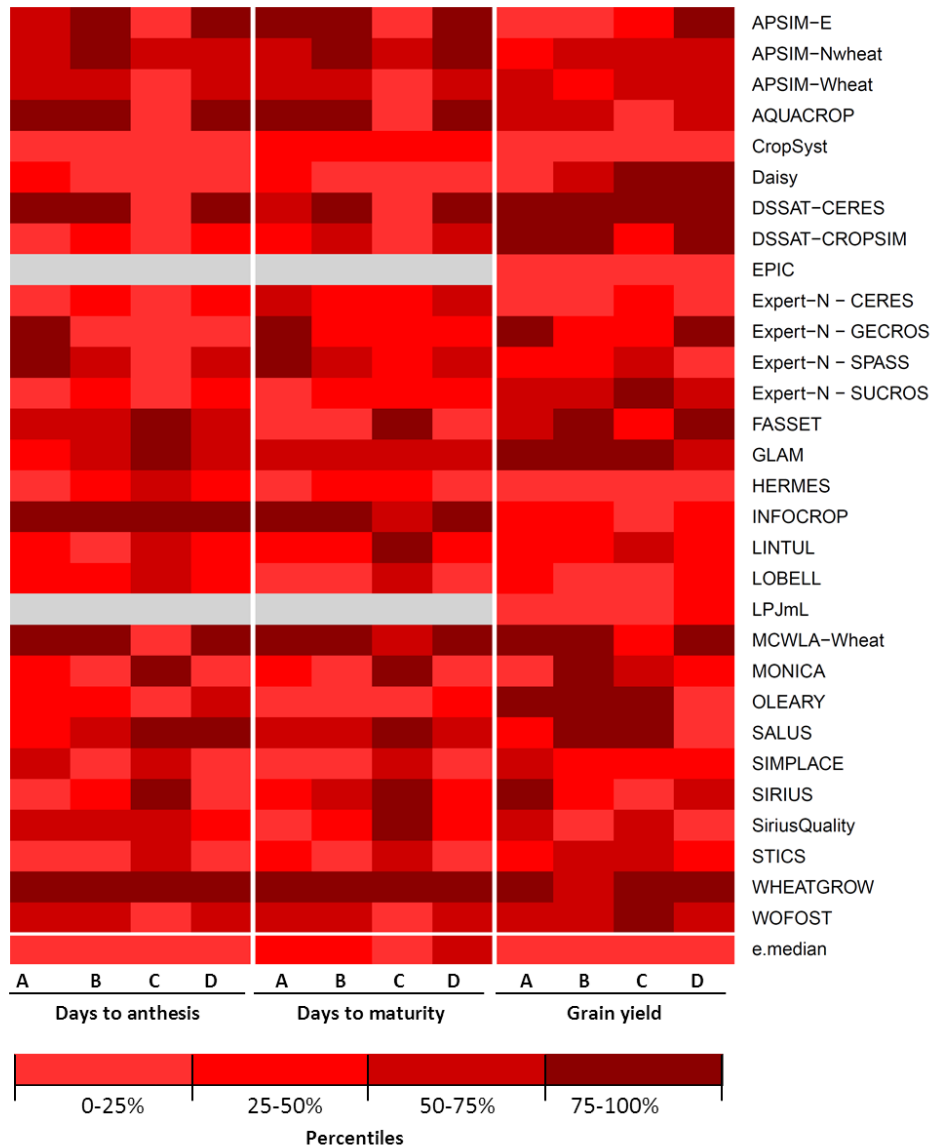

319

320 **Supplementary Table S5.** Root Mean Square Relative Error (RMSRE %) of 30 crop simulation models  
 321 grouped in quartiles (shown in red shades with quartile boundaries supplied in table above red shades) for  
 322 simulated anthesis and maturity dates, and grain yields for **CIMMYT** experiments for cultivar Bacanora  
 323 and Nesser at seven locations.

| Percentiles /<br>ensemble | RMSRE (%)        |          |                  |          |             |          |
|---------------------------|------------------|----------|------------------|----------|-------------|----------|
|                           | Days to anthesis |          | Days to maturity |          | Grain yield |          |
|                           | Nesser           | Bacanora | Nesser           | Bacanora | Nesser      | Bacanora |
| 0%                        | 0                | 1        | 1                | 2        | 28          | 22       |
| 25%                       | 6                | 5        | 5                | 5        | 42          | 44       |
| 50%                       | 7                | 7        | 6                | 6        | 52          | 53       |
| 75%                       | 9                | 9        | 8                | 9        | 63          | 59       |
| 100%                      | 28               | 24       | 20               | 101      | 97          | 106      |
| e.Median                  | 5                | 3        | 5                | 4        | 33          | 29       |

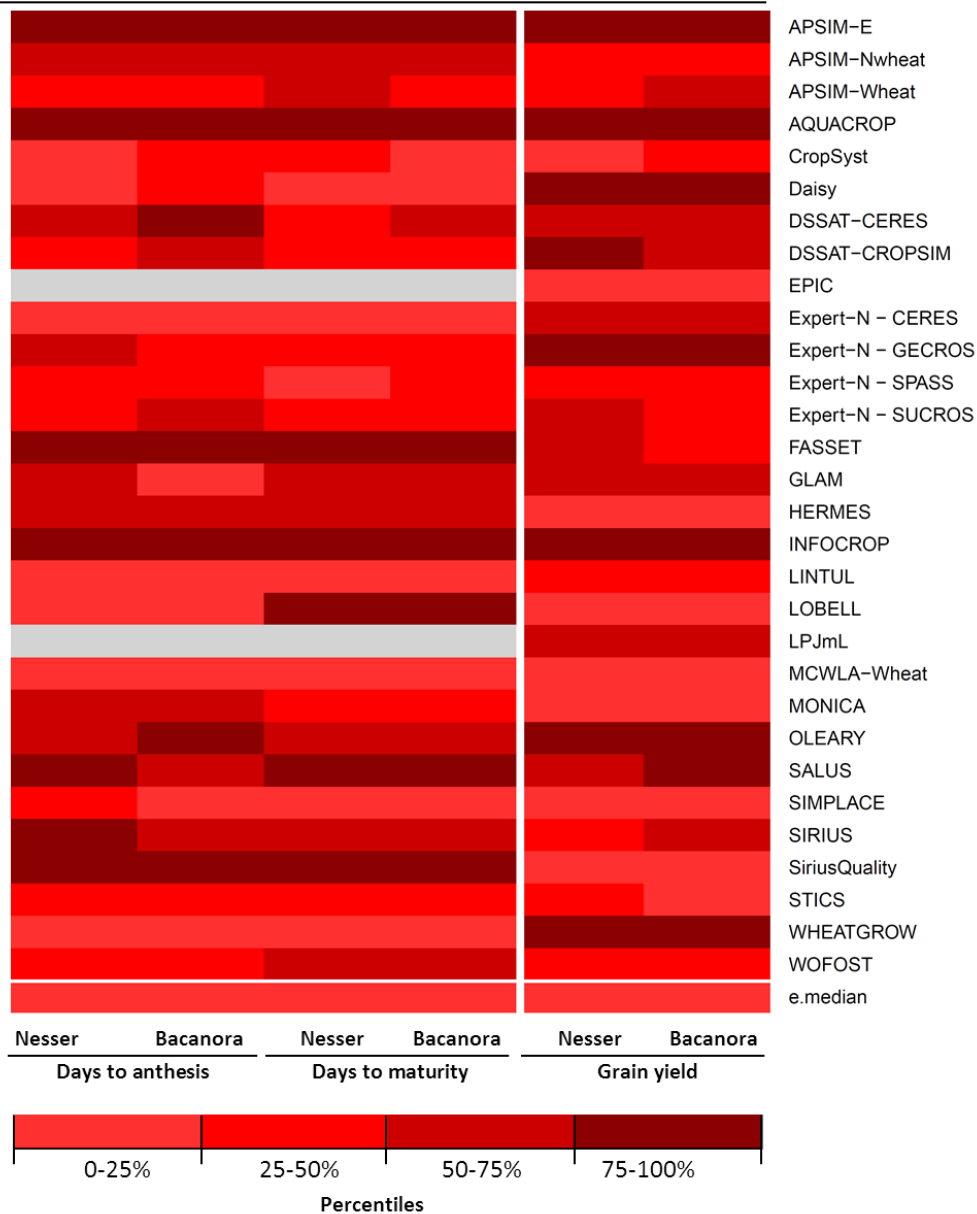

324

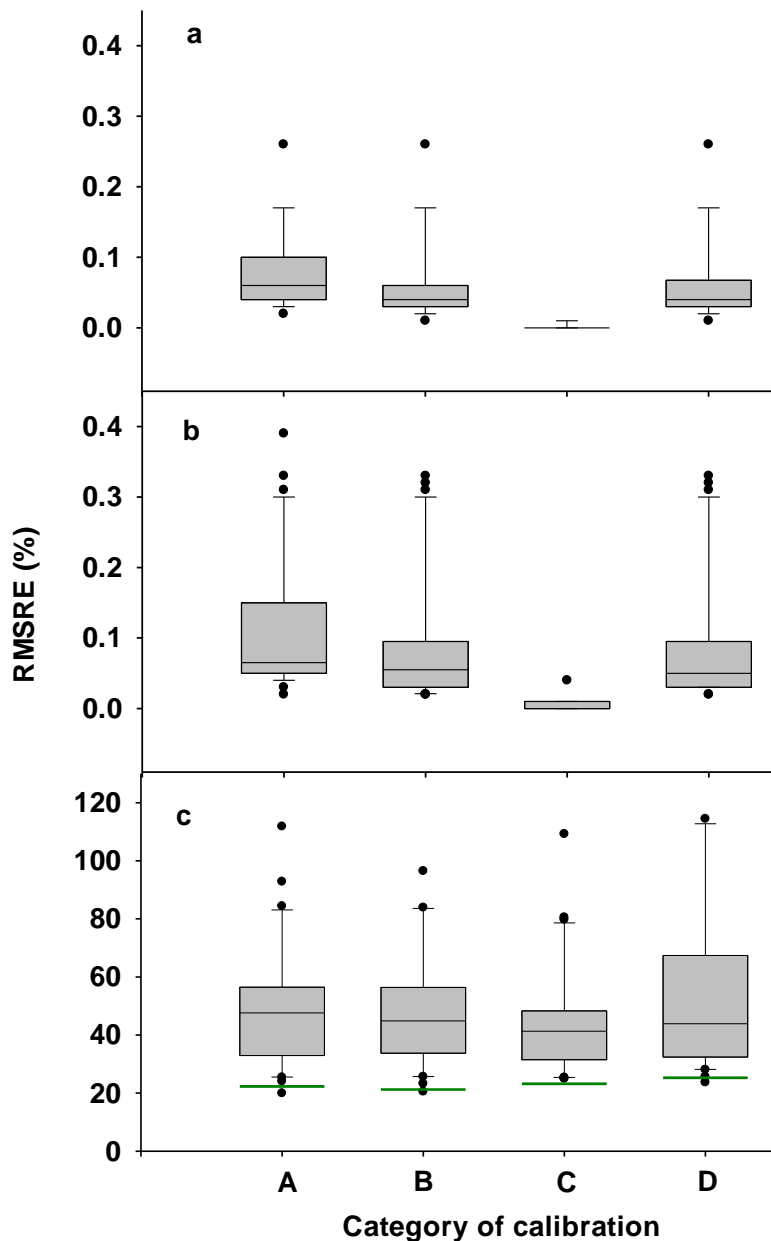

325

326 **Supplementary Fig. S10.** RMSRE (%) for 30 simulation models without calibration (step A- Blind test),  
 327 calibrated cultivar parameters across phenology dates (step B- Blind test with calibrated phenology),  
 328 simulations fixed to observed phenology (i.e. simulated phenology errors excluded) (step C- Blind test  
 329 with fixed phenology) and calibrated cultivar for phenology and yield for one normal range temperature  
 330 treatment with highest observed yield (step D- Blind test with calibrated highest yield) for (a) days from  
 331 sowing to anthesis, (b) sowing to maturity and (c) grain yield. In each box plot, horizontal lines represent,  
 332 from top to bottom, the 10<sup>th</sup> percentile, 25<sup>th</sup> percentile, median, 75<sup>th</sup> percentile, 90<sup>th</sup> percentile, and filled  
 333 circles represent outliers, of 30 models. The RMSRE of the 30-model ensemble median (when used as a  
 334 new predictor) is shown in (c) as a green horizontal line indicating the lowest errors.

335  
336

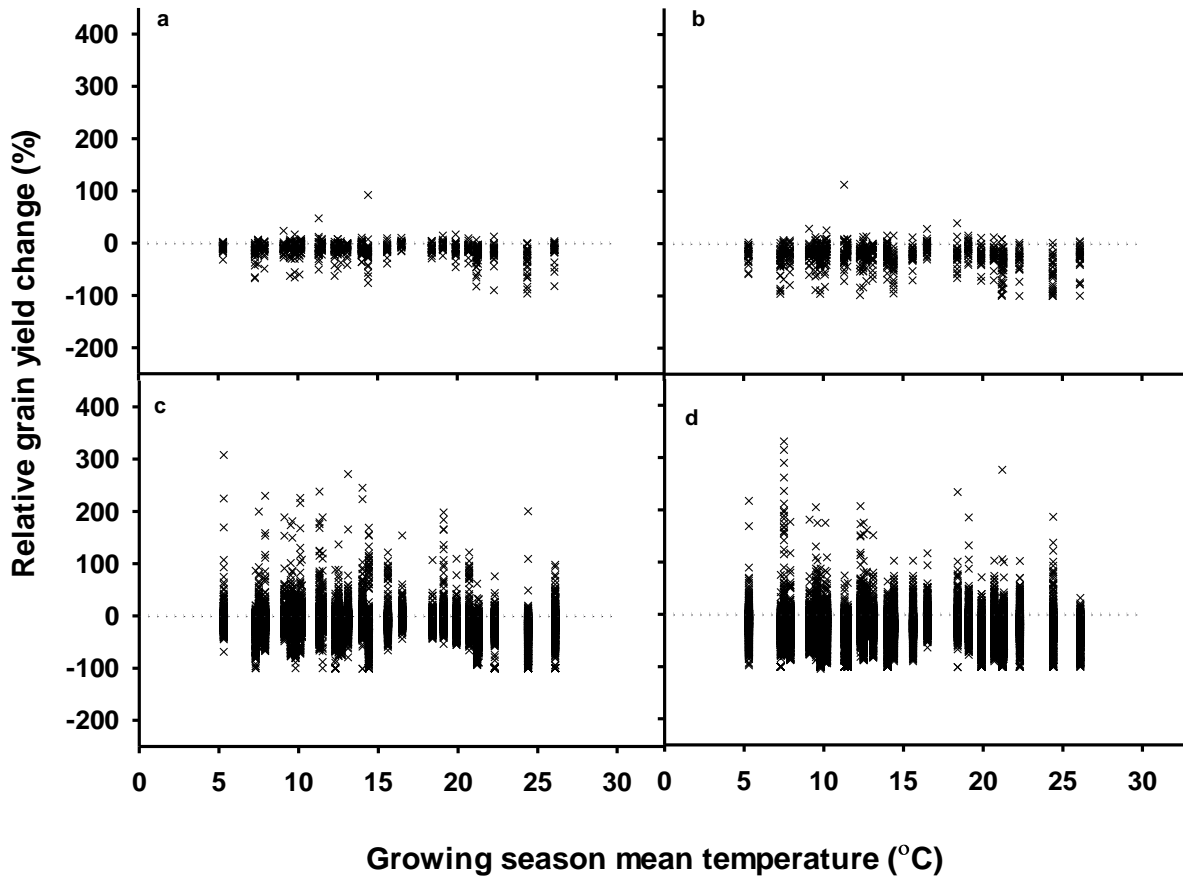

337

338 **Supplementary Fig. S11.** Simulated relative yield changes due to increasing temperature for 1981 to  
339 2010 and 30 locations. **(a,b)** 30-year average yield change per location and **(c,d)** individual year grain  
340 yield changes per location with **(a,c)** +2 °C and **(b,d)** +4 °C temperature increase versus baseline growing  
341 season mean temperatures per location and season, respectively.

342

343

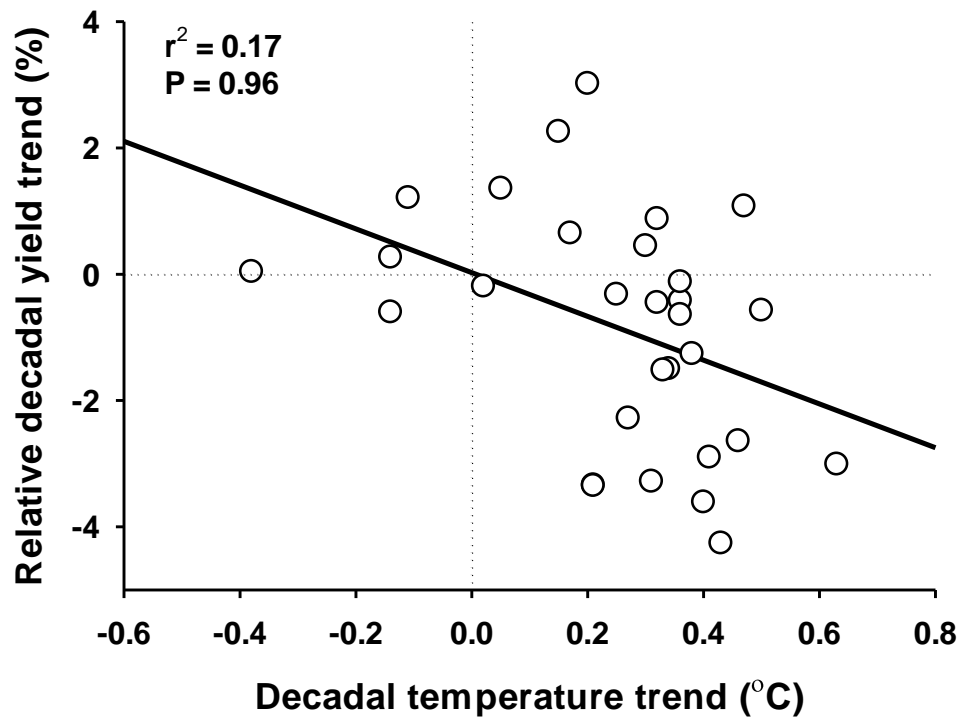

344

345 **Supplementary Fig. S12.** Relative decadal yield trend based on simulated 30-year model ensemble  
 346 median annual yields versus local temperature trend between 1981 and 2010 for 30 global locations.  
 347 Regression line (full line) and zero lines (dotted lines) are shown.

348

349

350

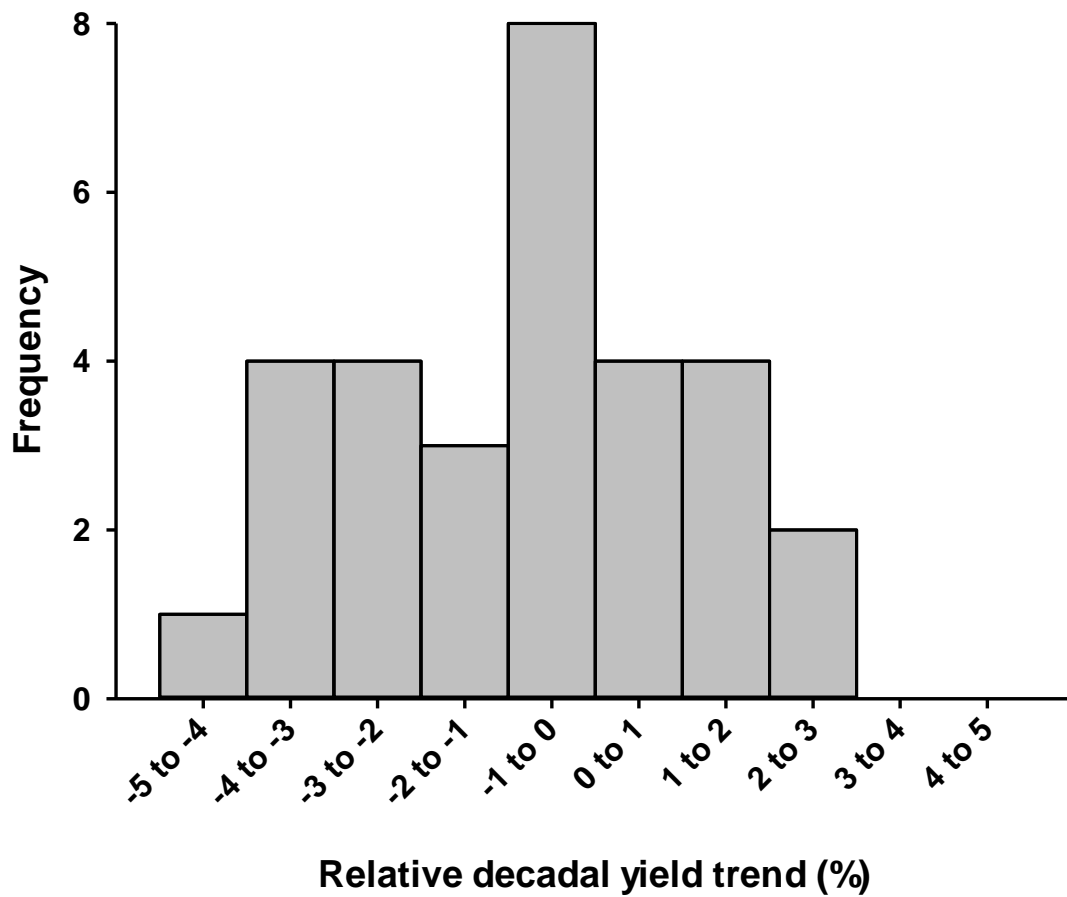

351

352 **Supplementary Fig. S13.** Frequency distribution of relative decadal yield change (%/decade) based on  
 353 simulated 30-year model ensemble median annual yields between 1981 and 2010 for 30 global locations.

354

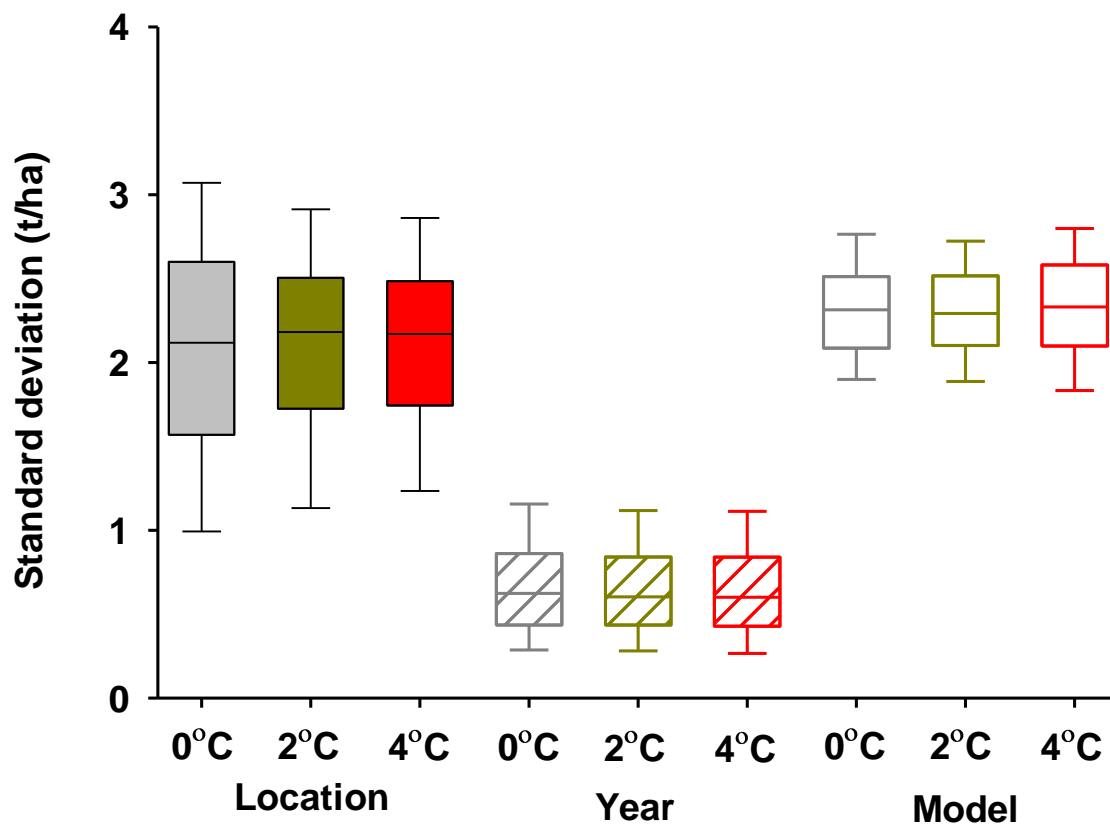

### Change in Temperature (°C)

355

356 **Supplementary Fig. S14.** Standard deviation (s.d.) for simulated grain yields across locations and years  
 357 and uncertainty due to crop models. In each box plot, horizontal lines represent, from top to bottom, the  
 358 10<sup>th</sup> percentile, 25<sup>th</sup> percentile, median, 75<sup>th</sup> percentile and 90<sup>th</sup> percentile of 900 simulations for current  
 359 climate (baseline) (grey), +2 °C (green) and +4 °C (red).

360

361



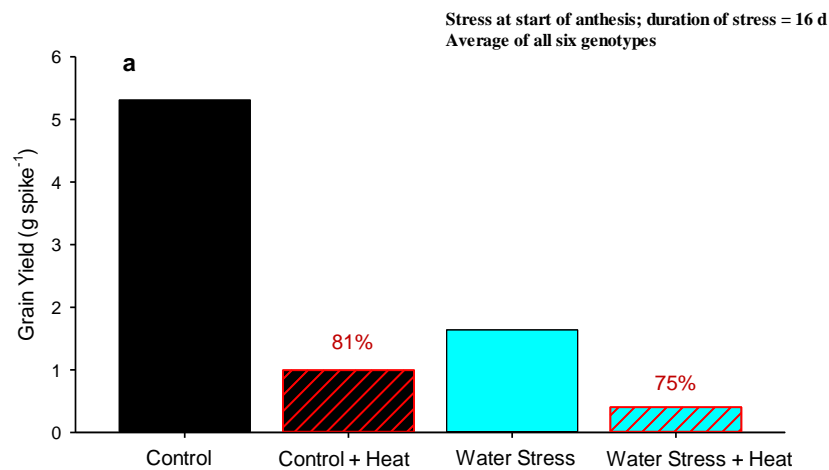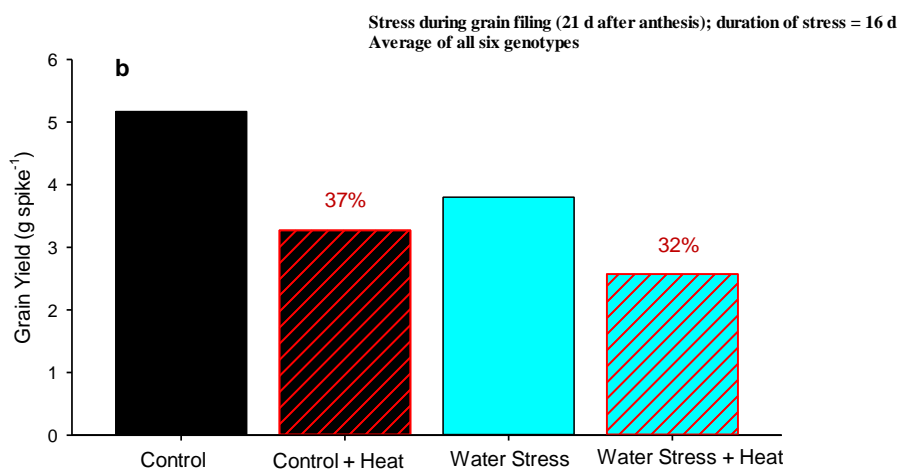

362

363

364 **Supplementary Fig. S15.** Measured mean (mean of six cultivars) wheat grain yield impact with  
 365 increased temperatures (optimum day/night temperature of 21/15 °C and high temperature stress of 36/30  
 366 °C) with and without water stress for (a) 16 days of high temperature stress starting from anthesis and (b)  
 367 for 16 days of high temperature stress during grain filling starting 21 days after anthesis. Note that g/spike  
 368 represents grain yield as the number of spikes was not affected by the temperature treatment. Numbers  
 369 indicate relative impacts due to increased temperatures. Re-calculated after Pradhan et al.<sup>77</sup>.

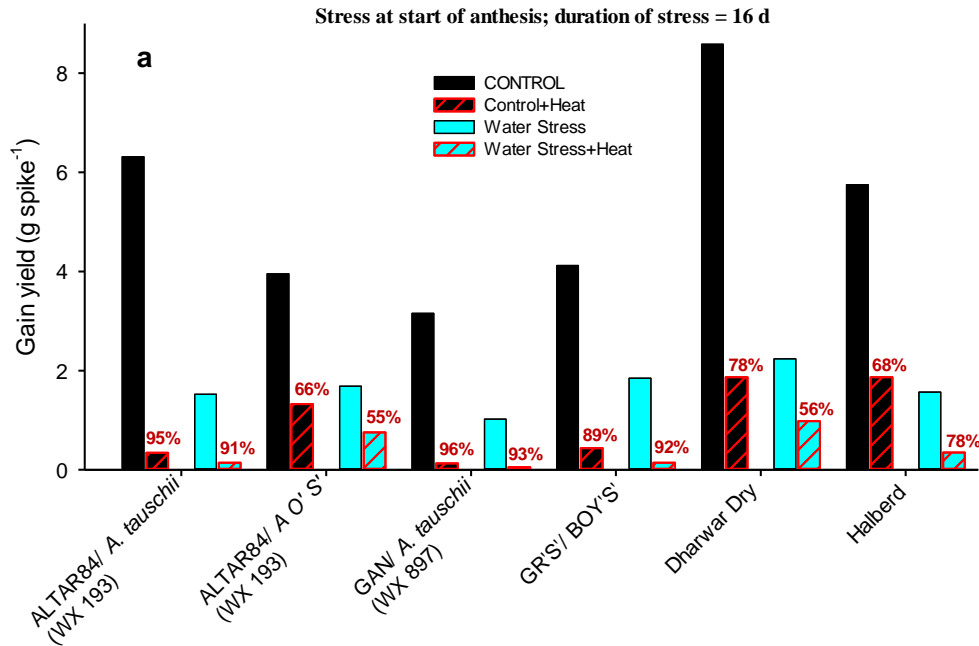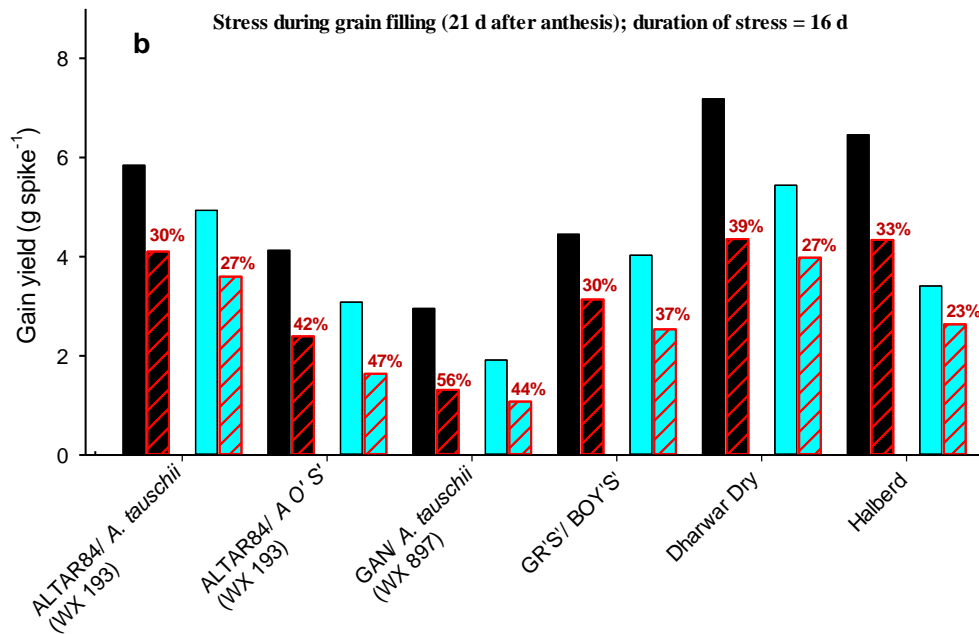

370

371 **Supplementary Fig. S16.** Measured wheat grain yield impact for six cultivars with increased  
 372 temperatures (optimum day/night temperature of 21/15 °C and high temperature stress of 36/30 °C) with  
 373 and without water stress for (a) 16 days of high temperature stress starting from anthesis and (b) for 16  
 374 days of high temperature stress during grain filling starting 21 days after anthesis. Note that g/spike  
 375 represents grain yield as the number of spikes was not affected by the temperature treatment. Numbers  
 376 indicate relative impacts due to increased temperatures. Re-calculated after Pradhan et al.<sup>77</sup>.

377

378

379

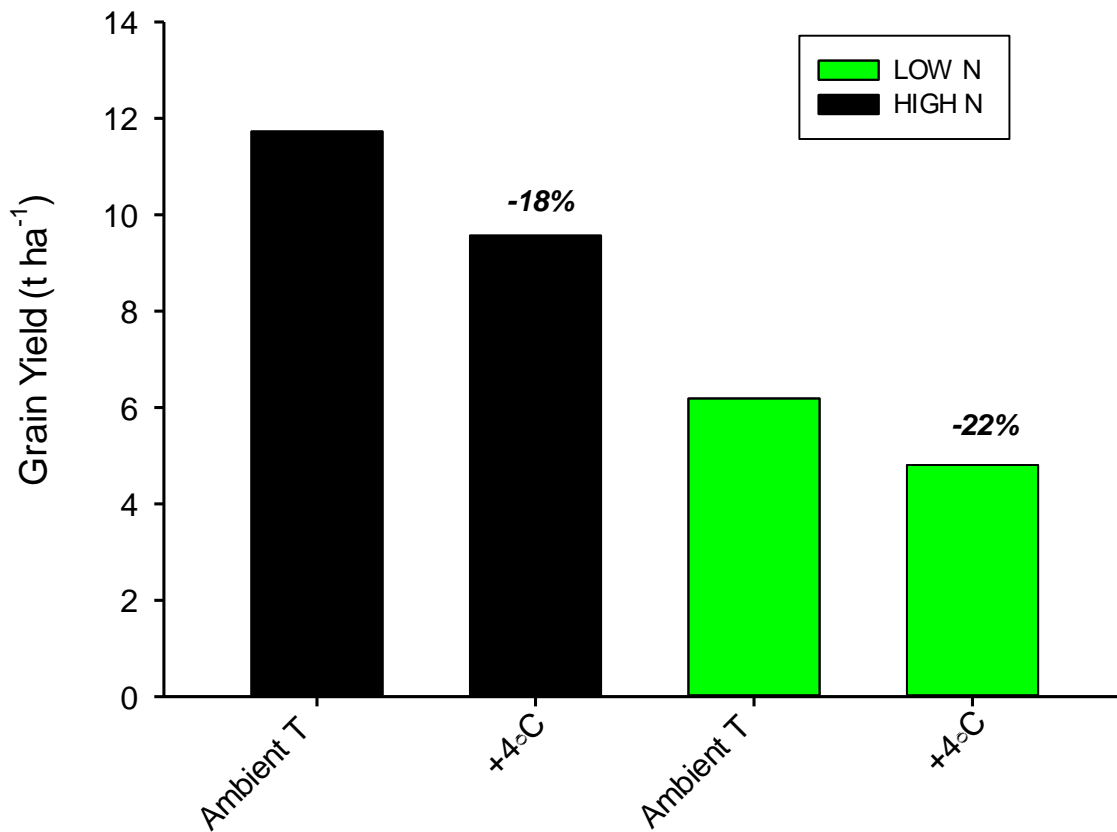

380

381

382 **Supplementary Fig. S17.** Measured mean wheat grain yield impact from increased temperatures for  
383 high N supply (black bars, 489 kg N/ha of fertiliser) and low N supply (green bars, 87 kg N/ha of  
384 fertiliser). Numbers indicate relative impacts due to increased temperatures. Re-calculated after Mitchell  
385 et al.<sup>78</sup>.

386

387

388

## 389 Supplementary References

- 390 1. Rosenzweig, C. et al. The Agricultural Model Intercomparison and Improvement Project (AgMIP):  
391 Protocols and pilot studies. *Agricultural and Forest Meteorology* **170**, 166-182 (2013).
- 392 2. Ottman, M.J., Kimball, B.A., White, J.W. & Wall, G.W. Wheat Growth Response to Increased  
393 Temperature from Varied Planting Dates and Supplemental Infrared Heating. *Agronomy Journal*  
394 **104**, 7-16 (2012).
- 395 3. Wall, G.W., Kimball, B.A., White, J.W. & Ottman, M.J. Gas exchange and water relations of spring  
396 wheat under full-season infrared warming. *Global Change Biology* **17**, 2113-2133 (2011).
- 397 4. Keating, B.A. et al. An overview of APSIM, a model designed for farming systems simulation.  
398 *European Journal of Agronomy* **18**, 267-288 (2003).
- 399 5. Wang, E. et al. Development of a generic crop model template in the cropping system model  
400 APSIM. *European Journal of Agronomy* **18**, 121-140 (2002).
- 401 6. Chen, C., Wang, E. & Yu, Q. Modeling Wheat and Maize Productivity as Affected by Climate  
402 Variation and Irrigation Supply in North China Plain. *Agronomy Journal* **102**, 1037-1049 (2010).
- 403 7. Asseng, S. et al. Performance of the APSIM-wheat model in Western Australia. *Field Crops*  
404 *Research* **57**, 163-179 (1998).
- 405 8. Asseng, S. et al. Simulated wheat growth affected by rising temperature, increased water deficit  
406 and elevated atmospheric CO<sub>2</sub>. *Field Crops Research* **85**, 85-102 (2004).
- 407 9. Steduto, P., Hsiao, T., Raes, D. & Fereres, E. AquaCrop-The FAO Crop Model to Simulate Yield  
408 Response to Water: I. Concepts and Underlying Principles. *Agronomy Journal* **101**, 426-437  
409 (2009).
- 410 10. Stockle, C., Donatelli, M. & Nelson, R. CropSyst, a cropping systems simulation model. *European*  
411 *Journal of Agronomy* **18**, 289-307 (2003).
- 412 11. Hansen, S., Jensen, H., Nielsen, N. & Svendsen, H. Simulation of nitrogen dynamics and biomass  
413 production in winter-wheat using the Danish simulation model DAISY. *Fertilizer Research* **27**,  
414 245-259 (1991).
- 415 12. Hansen, S., Abrahamsen, P., Petersen, C.T. & Styczen, M. DAISY: model use, calibration, and  
416 validation. *Transaction of the ASABE* **55**, 1317-1335 (2012).
- 417 13. Hoogenboom, G. & White, J. Improving physiological assumptions of simulation models by using  
418 gene-based approaches. *Agronomy Journal* **95**, 82-89 (2003).
- 419 14. Jones, J. et al. The DSSAT cropping system model. *European Journal of Agronomy* **18**, 235-265  
420 (2003).
- 421 15. Ritchie, J.T., Godwin, D.C. & Otter-Nacke, S. CERES-wheat: A user-oriented wheat yield model.  
422 Preliminary documentation (1985).
- 423 16. Hunt, L.A. & Pararajasingham, S. CROPSIM-wheat - a model describing the growth and  
424 development of wheat. *Canadian Journal of Plant Science* **75**, 619-632 (1995).
- 425 17. Kiniry, J. et al. EPIC model parameters for cereal, oilseed, and forage crops in the northern great-  
426 plains region. *Canadian Journal of Plant Science* **75**, 679-688 (1995).
- 427 18. Williams, J., Jones, C., Kiniry, J. & Spanel, D. The EPIC crop growth-model. *Transactions of the*  
428 *ASAE* **32**, 497-511 (1989).
- 429 19. Izaurrealde, R.C., McGill, W.B. & Williams, J.R. in Managing agricultural greenhouse gases:  
430 Coordinated agricultural research through GRACEnet to address our changing climate (eds.  
431 Liebig, M.A., Franzluebbers, A.J. & Follett, R.F.) 409-429 (Elsevier, Amsterdam, 2012).
- 432 20. Priesack, E., Gayler, S. & Hartmann, H. The impact of crop growth sub-model choice on  
433 simulated water and nitrogen balances. *Nutrient Cycling in Agroecosystems* **75**, 1-13 (2006).
- 434 21. Ritchie, S., Nguyen, H. & Holaday, A. Genetic diversity in photosynthesis and water-use  
435 efficiency of wheat and wheat relatives. *Journal of Cellular Biochemistry*, 43-43 (1987).

- 436 22. Biernath, C. et al. Evaluating the ability of four crop models to predict different environmental  
437 impacts on spring wheat grown in open-top chambers. *European Journal of Agronomy* **35**, 71-82  
438 (2011).
- 439 23. Stenger, R., Priesack, E., Barkle, G. & Sperr, C. (Land Treatment collective proceedings Technical  
440 Session, New Zealand, 1999).
- 441 24. Wang, E. & Engel, T. SPASS: a generic process-oriented crop model with versatile windows  
442 interfaces. *Environmental Modelling & Software* **15**, 179-188 (2000).
- 443 25. Yin, X. & van Laar, H.H. Crop systems dynamics: an ecophysiological simulation model of  
444 genotype-by-environment interactions (Wageningen Academic Publishers, Wageningen, The  
445 Netherlands, 2005).
- 446 26. Goudriaan, J. & Van Laar, H.H. (eds.) Modelling Potential Crop Growth Processes. Textbook With  
447 Exercises (Kluwer Academic Publishers, Dordrecht, The Netherlands, 1994).
- 448 27. Berntsen, J., Petersen, B., Jacobsen, B., Olesen, J. & Hutchings, N. Evaluating nitrogen taxation  
449 scenarios using the dynamic whole farm simulation model FASSET. *Agricultural Systems* **76**, 817-  
450 839 (2003).
- 451 28. Olesen, J. et al. Comparison of methods for simulating effects of nitrogen on green area index  
452 and dry matter growth in winter wheat. *Field Crops Research* **74**, 131-149 (2002).
- 453 29. Challinor, A., Wheeler, T., Craufurd, P., Slingo, J. & Grimes, D. Design and optimisation of a large-  
454 area process-based model for annual crops. *Agricultural and Forest Meteorology* **124**, 99-120  
455 (2004).
- 456 30. Li, S. et al. Simulating the Impacts of Global Warming on Wheat in China Using a Large Area Crop  
457 Model. *Acta Meteorologica Sinica* **24**, 123-135 (2010).
- 458 31. Kersebaum, K. Modelling nitrogen dynamics in soil-crop systems with HERMES. *Nutrient Cycling  
459 in Agroecosystems* **77**, 39-52 (2007).
- 460 32. Kersebaum, K.C. Special features of the HERMES model and additional procedures for  
461 parameterization, calibration, validation, and applications. *Ahuja, L.R. and Ma, L. (eds.).  
462 Methods of introducing system models into agricultural research. Advances in Agricultural  
463 Systems Modeling Series 2, Madison (ASA-CSSA-SSSA), 65-94 (2011).*
- 464 33. Aggarwal, P. et al. InfoCrop: A dynamic simulation model for the assessment of crop yields,  
465 losses due to pests, and environmental impact of agro-ecosystems in tropical environments. II.  
466 Performance of the model. *Agricultural Systems* **89**, 47-67 (2006).
- 467 34. Spitters, C.J.T. & Schapendonk, A.H.C.M. Evaluation of breeding strategies for drought tolerance  
468 in potato by means of crop growth simulation. *Plant and Soil* **123**, 193-203 (1990).
- 469 35. Shibu, M., Leffelaar, P., van Keulen, H. & Aggarwal, P. LINTUL3, a simulation model for nitrogen-  
470 limited situations: Application to rice. *European Journal of Agronomy* **32**, 255-271 (2010).
- 471 36. Gourdjji, S.M., Mathews, K.L., Reynolds, M., Crossa, J. & Lobell, D.B. An assessment of wheat  
472 yield sensitivity and breeding gains in hot environments. *Proceedings of the Royal Society B-  
473 Biological Sciences* **280** (2013).
- 474 37. Bondeau, A. et al. Modelling the role of agriculture for the 20th century global terrestrial carbon  
475 balance. *Global Change Biology* **13**, 679-706 (2007).
- 476 38. Beringer, T., Lucht, W. & Schaphoff, S. Bioenergy production potential of global biomass  
477 plantations under environmental and agricultural constraints. *Global Change Biology Bioenergy*  
478 **3**, 299-312 (2011).
- 479 39. Fader, M., Rost, S., Muller, C., Bondeau, A. & Gerten, D. Virtual water content of temperate  
480 cereals and maize: Present and potential future patterns. *Journal of Hydrology* **384**, 218-231  
481 (2010).

- 482 40. Gerten, D., Schaphoff, S., Haberlandt, U., Lucht, W. & Sitch, S. Terrestrial vegetation and water  
483 balance - hydrological evaluation of a dynamic global vegetation model. *Journal of Hydrology*  
484 **286**, 249-270 (2004).
- 485 41. Rost, S. et al. Agricultural green and blue water consumption and its influence on the global  
486 water system. *Water Resources Research* **44** (2008).
- 487 42. Müller, C. et al. Effects of changes in CO<sub>2</sub>, climate, and land use on the carbon balance of the  
488 land biosphere during the 21st century. *Journal of Geophysical Research-Biogeosciences* **112**  
489 (2007).
- 490 43. Tao, F., Yokozawa, M. & Zhang, Z. Modelling the impacts of weather and climate variability on  
491 crop productivity over a large area: A new process-based model development, optimization, and  
492 uncertainties analysis. *Agricultural and Forest Meteorology* **149**, 831-850 (2009).
- 493 44. Tao, F., Zhang, Z., Liu, J. & Yokozawa, M. Modelling the impacts of weather and climate  
494 variability on crop productivity over a large area: A new super-ensemble-based probabilistic  
495 projection. *Agricultural and Forest Meteorology* **149**, 1266-1278 (2009).
- 496 45. Tao, F. & Zhang, Z. Adaptation of maize production to climate change in North China Plain:  
497 Quantify the relative contributions of adaptation options. *European Journal of Agronomy* **33**,  
498 103-116 (2010).
- 499 46. Tao, F. & Zhang, Z. Climate change, wheat productivity and water use in the North China Plain: A  
500 new super-ensemble-based probabilistic projection. *Agricultural and Forest Meteorology* **170**,  
501 146-165 (2013).
- 502 47. Nendel, C. et al. The MONICA model: Testing predictability for crop growth, soil moisture and  
503 nitrogen dynamics. *Ecological Modelling* **222**, 1614-1625 (2011).
- 504 48. O'Leary, G., Connor, D. & White, D. A simulation-model of the development, growth and yield of  
505 the wheat crop. *Agricultural Systems* **17**, 1-26 (1985).
- 506 49. O'Leary, G. & Connor, D. A simulation model of the wheat crop in response to water and  
507 nitrogen supply .1. Model construction. *Agricultural Systems* **52**, 1-29 (1996).
- 508 50. O'Leary, G. & Connor, D. A simulation model of the wheat crop in response to water and  
509 nitrogen supply .2. Model validation. *Agricultural Systems* **52**, 31-55 (1996).
- 510 51. Latta, J. & O'Leary, G. Long-term comparison of rotation and fallow tillage systems of wheat in  
511 Australia. *Field Crops Research* **83**, 173-190 (2003).
- 512 52. Basso, B., Cammarano, D., Troccoli, A., Chen, D. & Ritchie, J. Long-term wheat response to  
513 nitrogen in a rainfed Mediterranean environment: Field data and simulation analysis. *European*  
514 *Journal of Agronomy* **33**, 132-138 (2010).
- 515 53. Senthilkumar, S., Basso, B., Kravchenko, A.N. & Robertson, G.P. Contemporary Evidence of Soil  
516 Carbon Loss in the US Corn Belt. *Soil Science Society of America Journal* **73**, 2078-2086 (2009).
- 517 54. Angulo, C. et al. Implication of crop model calibration strategies for assessing regional impacts of  
518 climate change in Europe. *Agricultural and Forest Meteorology* **170**, 32-46 (2013).
- 519 55. Jamieson, P., Semenov, M., Brooking, I. & Francis, G. Sirius: a mechanistic model of wheat  
520 response to environmental variation. *European Journal of Agronomy* **8**, 161-179 (1998).
- 521 56. Jamieson, P. & Semenov, M. Modelling nitrogen uptake and redistribution in wheat. *Field Crops*  
522 *Research* **68**, 21-29 (2000).
- 523 57. Lawless, C., Semenov, M. & Jamieson, P. A wheat canopy model linking leaf area and phenology.  
524 *European Journal of Agronomy* **22**, 19-32 (2005).
- 525 58. Semenov, M. & Shewry, P. Modelling predicts that heat stress, not drought, will increase  
526 vulnerability of wheat in Europe. *Scientific Reports* **1** (2011).
- 527 59. Martre, P. et al. Modelling protein content and composition in relation to crop nitrogen  
528 dynamics for wheat. *European Journal of Agronomy* **25**, 138-154 (2006).

- 529 60. Ferrise, R., Triossi, A., Stratonovitch, P., Bindi, M. & Martre, P. Sowing date and nitrogen  
530 fertilisation effects on dry matter and nitrogen dynamics for durum wheat: An experimental and  
531 simulation study. *Field Crops Research* **117**, 245-257 (2010).
- 532 61. He, J., Stratonovitch, P., Allard, V., Semenov, M.A. & Martre, P. Global Sensitivity Analysis of the  
533 Process-Based Wheat Simulation Model SiriusQuality1 Identifies Key Genotypic Parameters and  
534 Unravels Parameters Interactions. *Procedia - Social and Behavioral Sciences* **2**, 7676-7677  
535 (2010).
- 536 62. Brisson, N. et al. STICS: a generic model for the simulation of crops and their water and nitrogen  
537 balances. I. Theory and parameterization applied to wheat and corn. *Agronomie* **18**, 311-346  
538 (1998).
- 539 63. Brisson, N. et al. An overview of the crop model STICS. *European Journal of Agronomy* **18**, 309-  
540 332 (2003).
- 541 64. Cao, W. & Moss, D.N. Modelling phasic development in wheat: a conceptual integration of  
542 physiological components. *Journal of Agricultural Science* **129**, 163-172 (1997).
- 543 65. Cao, W. et al. Simulating organic growth in wheat based on the organ-weight fraction concept.  
544 *Plant Production Science* **5**, 248-256 (2002).
- 545 66. Yan, M., Cao, W. & C. Li, Z.W. Validation and evaluation of a mechanistic model of phasic and  
546 phenological development in wheat. *Chinese Agricultural Science* **1**, 77-82 (2001).
- 547 67. Li, C., Cao, W. & Zhang, Y. Comprehensive Pattern of Primordium Initiation in Shoot Apex of  
548 Wheat. *ACTA Botanica Sinica*, 273-278 (2002).
- 549 68. Hu, J., Cao, W., Zhang, J., Jiang, D. & Feng, J. Quantifying responses of winter wheat  
550 physiological processes to soil water stress for use in growth simulation modeling. *Pedosphere*  
551 **14**, 509-518 (2004).
- 552 69. Pan, J., Zhu, Y. & Cao, W. Modeling plant carbon flow and grain starch accumulation in wheat.  
553 *Field Crops Research* **101**, 276-284 (2007).
- 554 70. Pan, J. et al. Modeling plant nitrogen uptake and grain nitrogen accumulation in wheat. *Field*  
555 *Crops Research* **97**, 322-336 (2006).
- 556 71. Boogaard, H. & Kroes, J. Leaching of nitrogen and phosphorus from rural areas to surface waters  
557 in the Netherlands. *Nutrient Cycling in Agroecosystems* **50**, 321-324 (1998).
- 558 72. Alderman, P. et al. Proceeding on Modeling wheat response to high temperature (CIMMYT,  
559 CIMMYT, El Batan, Mexico, 19-21 June 2013, Mexico, D.F. CIMMYT, 2013).
- 560 73. Reynolds, M.P., Balota, M., Delgado, M.I.B., Amani, I. & Fischer, R.A. Physiological and  
561 morphological traits associated with spring wheat yield under hot, irrigated conditions.  
562 *Australian Journal of Plant Physiology* **21**, 717-730 (1994).
- 563 74. Weir, A.H., Bragg, P.L., Porter, J.R. & Rayner, J.H. A winter wheat crop simulation model without  
564 water or nutrient limitations. *Journal of Agricultural Science* **102**, 371-382 (1984).
- 565 75. Reynolds, M. & Braun, H. in Proceedings of the 3rd International Workshop of Wheat Yield  
566 Consortium (eds. Reynolds, M. & Braun, H.) ix-xi (CIMMYT, CENEB, CIMMYT, Obregon, Sonora,  
567 Mexico, 2013).
- 568 76. Collins, M. et al. Long-term Climate Change: Projections, Commitments and Irreversibility.  
569 *Intergovernmental Panel on Climate Change*, 108 (2013).
- 570 77. Pradhan, G.P., Prasad, P.V.V., Fritz, A.K., Kirkham, M.B. & Gill, B.S. Effects of drought and high  
571 temperature stress on synthetic hexaploid wheat. *Functional Plant Biology* **39**, 190-198 (2012).
- 572 78. Mitchell, R.A.C., Mitchell, V.J., Driscoll, S.P., Franklin, J. & Lawlor, D.W. Effects of increased CO<sub>2</sub>  
573 concentration and temperature on growth and yield of winter-wheat at 2 levels of nitrogen  
574 application. *Plant Cell and Environment* **16**, 521-529 (1993).

575

**Appendix Tables SA1.** Models cultivar parameters.

| Model        | Parameter |                                      | Unit          | Definition                                                                     | Simulation Step |        |       |       |        |
|--------------|-----------|--------------------------------------|---------------|--------------------------------------------------------------------------------|-----------------|--------|-------|-------|--------|
|              | #         | Name                                 |               |                                                                                | A               | B      | C-min | C-max | D      |
| APSIM-E      | 1         | shoot_lag                            | °Cday         | Time lag before linear coleoptile growth starts (deg days)                     | 40              | 56     | 20    | 150   | 56     |
|              | 2         | shoot_rate                           | °Cday/mm      | Growing deg day increase with depth for coleoptile (deg day/mm depth)          | 1.5             | 2.1    | 1.5   | 2.2   | 2.1    |
|              | 3         | tt_floral_initiation                 | °Cday         | Thermal time between terminal spikelet and flowering                           | 555             | 565    | 380   | 565   | 565    |
|              | 4         | vern_sens                            | -             | Sensitivity to vernalization                                                   | 1               | 1.1    | 0.2   | 1.5   | 1.1    |
|              | 5         | photop_sens                          | -             | Sensitivity to photoperiod                                                     | 1.2             | 1.1    | 0.5   | 1.5   | 1.1    |
|              | 6         | tt_start_grain_fill                  | °Cday         | Thermal time of the duration of grain filling                                  | 660             | 600    | 20    | 900   | 600    |
|              | 7         | max_grain_size                       | g/grain       | maximum grain size                                                             | 0.05            | -      | 0.05  | 0.05  | 0.045  |
| APSIM-Nwheat | 1         | P5                                   | °Cday         | Thermal time grain filling                                                     | 660             | -      | 220   | 880   | 660    |
|              | 2         | PHINT                                | °Cday         | Phyllochron                                                                    | 120             | 105    | 40    | 150   | 105    |
|              | 3         | Grno                                 | kernel/g-stem | Coefficient of kernel number per stem weight at the beginning of grain filling | 2.4             | -      | -     | -     | 2.1    |
|              | 4         | Fillrate                             | kernel/g-stem | Maximum kernel growth rate                                                     | 1.9             | -      | -     | -     | 3      |
|              | 5         | Sowing                               | days          | Moved sowing dates                                                             | -               | -      | 0     | 12    | -      |
| APSIM-wheat  | 1         | shoot_lag                            | °Cday         | Thermal time germination to emergence where shoot elongation is slow           | 50              | -      | 20    | 100   | -      |
|              | 2         | tt_end_of_juvenile                   | °Cday         | Thermal time end juvenile to floral initiation                                 | 425             | -      | 280   | 515   | -      |
|              | 3         | tt_floral_initiation                 | °Cday         | Thermal time floral initiation to flowering                                    | 580             | -      | 380   | 700   | -      |
|              | 4         | startgf_to_mat                       | °Cday         | Thermal time start grain fill to maturity                                      | 660             | 500    | 40    | 920   | -      |
|              | 5         | tt_flowering                         | °Cday         | Thermal time flowering                                                         | 120             | 120    | 35    | 120   | -      |
|              | 6         | grains_per_gram_stem                 | grain/g       |                                                                                | 24              | -      | -     | -     | 29     |
|              | 7         | potential_grain_filling_rate         | g/grain/day   |                                                                                | -               | 0.0019 | -     | -     | 0.0022 |
| AQUACROP     | 1         | DAS to emergence                     | °Cday         | Days from sowing to emergence                                                  | 114             | 121    | 5     | 13    | 121    |
|              | 2         | DAS to flowering                     | °Cday         | Days from sowing to flowering                                                  | 1180            | 1288   | 43    | 121   | 1288   |
|              | 3         | DAS to maturity                      | °Cday         | Days from sowing to maturity                                                   | 1854            | 2064   | 58    | 176   | 2064   |
|              | 4         | DAS to maximum canopy cover          | °Cday         | Days from sowing to maximum canopy cover                                       | -               | -      | -     | -     | 700    |
| CropSyst     | 1         | Degree days to emergence             | °Cday         | Degree-days to emergence                                                       | 85              | -      | 55    | 160   | 85     |
|              | 2         | Degree days to end vegetative growth | °Cday         | Degree-days to end vegetative growth                                           | 840             | 760    | 690   | 1040  | 700    |
|              | 3         | Degree days to anthesis              | °Cday         | Degree days to anthesis                                                        | 940             | 860    | 790   | 1140  | 860    |



|               |    |                                     |                                      |                                                               |                                                                                                                                     |      |      |      |                                                                      |
|---------------|----|-------------------------------------|--------------------------------------|---------------------------------------------------------------|-------------------------------------------------------------------------------------------------------------------------------------|------|------|------|----------------------------------------------------------------------|
|               | 4  | Degree days to begin grain filling  | $^{\circ}\text{Cday}$                | Degree-days to begin grain filling                            | 1050                                                                                                                                | 960  | 925  | 1240 | 960                                                                  |
|               | 5  | Degree days begin canopy senescence | $^{\circ}\text{Cday}$                | Degree-days to begin canopy senescence                        | 1100                                                                                                                                | 1060 | 1025 | 1340 | 760                                                                  |
|               | 6  | Degree days maturity                | $^{\circ}\text{Cday}$                | Degree-days to maturity                                       | 1510                                                                                                                                | 1435 | 1150 | 1730 | 1435                                                                 |
| DAISY         | 1  | Fm                                  | $\text{CO}_2/\text{m}^2/\text{hour}$ | Maximum assimilation rate                                     | 4                                                                                                                                   | -    | -    | -    | 5                                                                    |
|               | 2  | SpLAI                               | $\text{m}^2/\text{g DM}$             | Specific leaf area                                            | 0.031                                                                                                                               | -    | -    | -    | 0.039                                                                |
|               | 3  | LeafAIMod                           | -                                    | Specific leaf area modifier                                   | (0 1) (2 1)                                                                                                                         | -    | -    | -    | (0.0 1)<br>(1.17 0.29)<br>(2.0 0)                                    |
|               | 4  | Leaf                                | -                                    | Fraction of shoot assimilate that goes to the leaves          | (0.00 0.82)<br>(0.25 0.70)<br>(0.51 0.55)<br>(0.60 0.50)<br>(0.72 0.23)<br>(0.83 0.01)<br>(0.95 0.00)<br>(2.00 0.00)                | -    | -    | -    | (0.00 0.41)<br>(0.87 0.95)<br>(1 0.59)<br>(1.25 0.00)<br>(2.00 0.00) |
|               | 5  | Stem                                | -                                    | Fraction of shoot assimilate that goes to the stem            | (0.00 0.18)<br>(0.25 0.30)<br>(0.51 0.45)<br>(0.60 0.50)<br>(0.72 0.77)<br>(0.83 0.99)<br>(0.95 1.00)<br>(1.51 0.00)<br>(2.00 0.00) | -    | -    | -    | (0.00 0.59)<br>(0.87 0.05)<br>(1 0.40)<br>(1.25 0.00)<br>(2.00 0.00) |
|               | 6  | E_Leaf                              | -                                    | Conversion efficiency, leaf                                   | 0.68                                                                                                                                | -    | -    | -    | 0.79                                                                 |
|               | 7  | E_Stem                              | -                                    | Conversion efficiency, stem                                   | 0.66                                                                                                                                | -    | -    | -    | 0.69                                                                 |
|               | 8  | E_SOrg                              | -                                    | Conversion efficiency, storage organ                          | 0.7                                                                                                                                 | -    | -    | -    | 0.87                                                                 |
|               | 9  | ReMobilDS                           | -                                    | Remobilization, Initial DS                                    | 1                                                                                                                                   | -    | -    | -    | 1.3                                                                  |
|               | 10 | ReMobilRt                           | 1/day                                | Remobilization, release rate                                  | 0.1                                                                                                                                 | -    | -    | -    | 0.16                                                                 |
| DSSAT-CERES   | 1  | P1V                                 | $^{\circ}\text{C}$                   | Optimum vernalizing temperature                               | 5                                                                                                                                   | 0.2  | 0    | 10   | 0.2                                                                  |
|               | 2  | P1D                                 | %reduction/h near threshold          | Photoperiod response                                          | 32                                                                                                                                  | 0.5  | 0.5  | 117  | 0.5                                                                  |
|               | 3  | P5                                  | $^{\circ}\text{Cday}$                | Grain filling (excluding lag) phase duration                  | 608                                                                                                                                 | 663  | 300  | 876  | 663                                                                  |
|               | 4  | G1                                  | grain#/g                             | Kernel number per unit canopy weight at anthesis              | 24                                                                                                                                  | -    | -    | -    | 19.7                                                                 |
|               | 5  | G2                                  | mg/grain                             | Maximum grain size                                            | 60                                                                                                                                  | -    | -    | -    | 41                                                                   |
|               | 6  | G3                                  | Mg/day                               | Standard, non-stressed mature tiller weight (including grain) | 3                                                                                                                                   | -    | -    | -    | 0.3                                                                  |
|               | 7  | PHINT                               | $^{\circ}\text{Cday}$                | Phyllocron                                                    | 100                                                                                                                                 | -    | -    | -    | 79                                                                   |
| DSSAT-CROPSIM | 1  | GN_p_S                              | %                                    | Standard grain nitrogen concentration                         | 3                                                                                                                                   | -    | -    | -    | 2.4                                                                  |
|               | 2  | P1                                  | $^{\circ}\text{Cday}$                | Duration of phase (1); germinate                              | 390                                                                                                                                 | 360  | 380  | 380  | 370                                                                  |
|               | 3  | P2                                  | $^{\circ}\text{Cday}$                | Duration of phase (2); terminal spikelet                      | 70                                                                                                                                  | 65   | 70   | 70   | 70                                                                   |

|                  |    |         |                            |                                                                                                                            |       |      |      |      |       |
|------------------|----|---------|----------------------------|----------------------------------------------------------------------------------------------------------------------------|-------|------|------|------|-------|
|                  | 4  | P3      | °Cday                      | Duration of phase (3); pseudo-stem                                                                                         | 210   | 170  | 175  | 175  | 170   |
|                  | 5  | P4      | °Cday                      | Duration of phase (4); end leaf                                                                                            | 185   | 160  | 165  | 165  | 160   |
|                  | 6  | P5      | °Cday                      | Duration of phase (5); heading                                                                                             | 60    | 50   | -    | -    | -     |
|                  | 7  | P8      | °Cday                      | Duration of phase (8); milk-dough                                                                                          | 570   | 600  | 220  | 840  | 600   |
|                  | 8  | PEMRG   | °Cday per cm depth in soil | Emergence phase duration                                                                                                   | 10    | -    | 20   | 15   | 10    |
|                  | 9  | PGERM   | Hydrothermal units         | Phase duration, germination                                                                                                | 10    | -    | 20   | 15   | 8     |
|                  | 10 | PHINT   | °Cday                      | Phyllocron                                                                                                                 | 80    | 100  | 100  | 100  | 100   |
|                  | 11 | PPS1    | % reduction in rate        | Photoperiod sensitivity as % drop in rate                                                                                  | 50    | 65   | 0    | 68   | 65    |
|                  | 12 | TRGEM_0 | °C                         | Base temperature, germination and pre-emergence growth rate                                                                | 1     | -    | -3   | -3   | 0     |
|                  | 13 | TRGEM_1 | °C                         | Optimal temperature (Topt1),germination and pre-emergence                                                                  | 26    | -    | -    | -    | 20    |
|                  | 14 | VEFF    | -                          | Vernalization effect (rate reduction when unvernalized)                                                                    | 0     | 0.3  | -    | -    | -     |
|                  | 15 | VREQ    | day                        | Vernalization required for maximum development rate                                                                        | 15    | 2    | 0    | 35   | 8     |
| EPIC             | 1  | GMHU    | °Cday                      | Thermal time between sowing and emergence                                                                                  | 0     | 80   | 45   | 390  | 80    |
|                  | 2  | PHU     | °Cday                      | Thermal time between emergence and maturity                                                                                | 1380  | 1300 | 1085 | 1540 | 1300  |
|                  | 3  | DMLA    | -                          | Maximum potential LAI                                                                                                      | 6     | -    | -    | -    | 9.31  |
|                  | 4  | RLAD    | -                          | LAI decline parameter (1 is linear, >1 accelerates, <1 retards decline rate)                                               | 1     | -    | -    | -    | 1.46  |
|                  | 5  | DLAI    | -                          | Fraction of growing season when LAI declines                                                                               | 0.6   | -    | -    | -    | 0.355 |
|                  | 6  | DLAP1   | -                          | First point on optimal LAI curve - Number before decimal is % of growing season, number after decimal is % of maximum LAI  | 15.01 | -    | -    | -    | 17.15 |
|                  | 7  | DLAP2   | -                          | Second point on optimal LAI curve - Number before decimal is % of growing season, number after decimal is % of maximum LAI | 50.95 | -    | -    | -    | 43.99 |
|                  | 8  | WA      | -                          | Potential growth rate per unit of intercepted PAR                                                                          | 35    | -    | -    | -    | 29.6  |
|                  | 9  | HI      | -                          | Harvest index                                                                                                              | 0.45  | -    | -    | -    | 0.43  |
|                  | 10 | CNY     | -                          | Nitrogen fraction in yield                                                                                                 | 0.03  | -    | -    | -    | -     |
|                  | 11 | BN1     | -                          | Nitrogen fraction in plant at emergence                                                                                    | 0.066 | -    | -    | -    | 0.046 |
|                  | 12 | BN2     | -                          | Nitrogen fraction in plant at 0.5 maturity                                                                                 | 0.025 | -    | -    | -    | 0.02  |
|                  | 13 | BN3     | -                          | Nitrogen fraction in plant at maturity                                                                                     | 0.015 | -    | -    | -    | 0.01  |
| Expert-N – CERES | 1  | G1      | #grain/g                   | Grains per unit stem weight at                                                                                             | 24    | -    | -    | -    | 32.45 |

|                   |   |                           |                                |                                                                 |         |       |       |      |        |
|-------------------|---|---------------------------|--------------------------------|-----------------------------------------------------------------|---------|-------|-------|------|--------|
|                   |   |                           |                                | anthesis                                                        |         |       |       |      |        |
|                   | 2 | G2                        | mg/grain/d                     | Maximum grain filling rate                                      | 1.9     | -     | -     | -    | 1.8    |
| Expert-N – GECROS | 1 | LWLV                      | 1/day                          | Loss rate of leaf weight because of leaf senescence             | 0.01    | -     | -     | -    | 0.03   |
|                   | 2 | STEMNCOMIN                | g N/ g                         | Minimum N concentration in stems                                | 0.01    | -     | -     | -    | 0.0037 |
|                   | 3 | LEAFNCOMIN                | g N/m                          | Minimum specific N concentration in leaves                      | 0.35    | -     | -     | -    | 0.261  |
|                   | 4 | LNCI                      | g N/g                          | Initial leaf nitrogen concentration                             | 0.054   | -     | -     | -    | 0.06   |
|                   | 5 | SLA                       | m <sup>2</sup> /g              | Specific leaf area                                              | 0.028   | -     | -     | -    | 0.0264 |
| Expert-N – SPASS  | 1 | LUE                       | g/J/m <sup>2</sup>             | Light use efficiency                                            | 0.6     | -     | -     | -    | 0.7    |
|                   | 2 | G1                        | #grain/g                       | Number of grains per unit stem weight at anthesis               | 24      | -     | -     | -    | 36     |
|                   | 3 | G2                        | mg/grain/day                   | Maximum grain filling rate                                      | 1.9     | -     | -     | -    | 1.6    |
|                   | 4 | SpCLW                     | cm <sup>2</sup> /g             | Specific leaf weight                                            | 500     | -     | -     | -    | 433    |
|                   | 5 | Rext                      | cm/day                         | Maximum root extension rate                                     | 3       | -     | -     | -    | 1.63   |
| Expert-N – SUCROS | 1 | LUE                       | g/J/m <sup>2</sup>             | Light use efficiency                                            | 0.6     | -     | -     | -    | 0.7    |
|                   | 2 | G1                        | #grain/g                       | Number of grains per unit stem weight at anthesis               | 24      | -     | -     | -    | 33     |
|                   | 3 | SpCLW                     | cm <sup>2</sup> /g             | Specific leaf weight                                            | 500     | -     | -     | -    | 385    |
| FASSET            | 1 | TTS0                      | °Cday                          | Thermal time between sowing and crop emergence                  | 250     | 204   | 75    | 355  | 204    |
|                   | 2 | TTS1                      | °Cday                          | Thermal time between crop emergence and anthesis                | 445     | 371   | 275   | 565  | 371    |
|                   | 3 | TTS2                      | °Cday                          | Thermal time between anthesis and end of grain filling          | 388     | 536   | 250   | 720  | 536    |
|                   | 4 | MaxGAI                    | m <sup>2</sup> /m <sup>2</sup> | Maximum crop green leaf area index                              | 7       | -     | -     | -    | 8      |
|                   | 5 | LAIM                      | m <sup>2</sup> /g <sup>1</sup> | Maximum ratio between LAI and DM in vegetative top part         | 0.011   | -     | -     | -    | 0.015  |
|                   | 6 | LAINratio                 | m <sup>2</sup> /g <sup>1</sup> | Maximum ratio between LAI and N in vegetative top part          | 0.4     | -     | -     | -    | 0.6    |
|                   | 7 | MaxAlloctoroot            | -                              | Maximum fraction of DM production that is allocated to the root | 0.6     | -     | -     | -    | 0.3    |
|                   | 8 | MaxNO <sub>3</sub> UpRate | g N/m/day                      | Maximum uptake rate for nitrate-N                               | 0.00006 | -     | -     | -    | 0.0001 |
|                   | 9 | MaxNH <sub>4</sub> UpRate | G N/m/day                      | Maximum uptake rate for ammonium-N                              | 0.0006  | -     | -     | -    | -      |
| GLAM              | 1 | GCPLFL                    | °Cday                          | Thermal time from emergence to anthesis                         | 1205    | 1261  | 905   | 1515 | -      |
|                   | 2 | GCFLPF                    | °Cday                          | Thermal time from anthesis to grain filling                     | 176     | 184   | 132   | 221  | -      |
|                   | 3 | GCPFEN                    | °Cday                          | Thermal time duration of grain filling                          | 509     | 442   | 34    | 729  | -      |
|                   | 4 | GCENHA                    | °Cday                          | Thermal time from end of grain filling to harvest maturity      | 96      | 82    | 6     | 135  | -      |
|                   | 5 | DLDTMXA                   | -                              | maximum change in LAI after anthesis                            | 0.1     | 0.006 | 0.006 | 0.1  | -      |
|                   | 6 | DHDT                      | -                              | Rate of change in harvest index                                 | -       | -     | -     | -    | 0.0175 |
|                   | 7 | P_TRANS_MAX               | cm/day                         | Maximum value of potential transpiration                        | -       | -     | -     | -    | 0.8    |

|          |    |            |                                    |                                                                                                    |        |      |       |       |        |
|----------|----|------------|------------------------------------|----------------------------------------------------------------------------------------------------|--------|------|-------|-------|--------|
| HERMES   | 1  | TS1        | °Cday                              | Thermal time between sowing and crop emergence                                                     | 140    | 165  | 80    | 295   | 140    |
|          | 2  | TS2        | °Cday                              | Thermal time between crop emergence and double ridge                                               | 320    | 282  | -     | -     | -      |
|          | 3  | TS3        | °Cday                              | Thermal time between double ridge and heading                                                      | 490    | -    | 295   | 620   | 500    |
|          | 4  | TS5        | °Cday                              | Thermal time between flowering and maturity                                                        | 330    | 440  | 225   | 620   | 440    |
|          | 5  | Tbase1     |                                    |                                                                                                    | 1      | 0    | -     | -     | -      |
|          | 6  | Tbase5     |                                    |                                                                                                    | 9      | 6    | -     | -     | -      |
|          | 7  | mois       | % avail. water                     | Soil moisture threshold in 0-10 cm layer where germination starts to be retarded (linear increase) | 0      | 70   | -     | -     | -      |
|          | 8  | dayl2      | Hour                               | Daylength requirement for development between emergence and double ridge                           | 0      | 15   | -     | -     | -      |
|          | 9  | dlbase2    | Hour                               | Daylength base for development between emergence and double ridge                                  | 0      | 5    | -     | -     | -      |
|          | 10 | Lf_bio_ini | kg DM/ha                           | Leaf biomass at emergence                                                                          | 53     | -    | -     | -     | 80     |
|          | 11 | rt_bio_ini | kg DM/ha                           | Root biomass at emergence                                                                          | 53     | -    | -     | -     | 80     |
|          | 12 | SLA1       | m <sup>2</sup> /m <sup>2</sup> /kg | Specific leaf area per dry weight at emergence                                                     | 0.002  | -    | -     | -     | 0.0037 |
|          | 13 | SLA2       | m <sup>2</sup> /m <sup>2</sup> /kg | Specific leaf area per dry weight at double ridge                                                  | 0.0017 | -    | -     | -     | 0.0025 |
|          | 14 | part_lf2   |                                    | Fraction of dry matter allocated to leaves at double ridge                                         | 0.6    | -    | -     | -     | 0.7    |
|          | 15 | part_st2   |                                    | Fraction of dry matter allocated to stems at double ridge                                          | 0.2    | -    | -     | -     | 0.1    |
|          | 16 | part_lf3   |                                    | Fraction of dry matter allocated to leaves at ear emergence                                        | 0.5    | -    | -     | -     | 0.15   |
|          | 17 | part_st3   |                                    | Fraction of dry matter allocated to stems at ear emergence                                         | 0.37   | -    | -     | -     | 0.75   |
|          | 18 | part_rt3   |                                    | Fraction of dry matter allocated to roots at ear emergence                                         | 0.13   | -    | -     | -     | 0.1    |
| INFOCROP | 1  | TTGERM     | °Cday                              | Thermal time between sowing and crop emergence                                                     | 37     | 42   | 23    | 90    | 30     |
|          | 2  | TTVG       | °Cday                              | Thermal time between crop emergence and 50% flowering                                              | 1200   | 1120 | 350   | 1500  | 1100   |
|          | 3  | TTGF       | °Cday                              | Thermal time for grain filling period (50% flowering to Physiological maturity)                    | 975    | 1120 | 730   | 1320  | 1100   |
|          | 4  | POTGWT     | mg/grain                           | Maximum potential grain mass                                                                       | 66.5   | 48   | -     | -     | -      |
|          | 5  | GNOCF      | -                                  | Factor determining the grain number before anthesis                                                | 30000  | -    | 30000 | 42000 | 30000  |
| LINTUL   | 1  | TSUM1      | °Cday                              | Thermal time from emergence to anthesis                                                            | 1130   | 1100 | -     | -     | -      |

|   |       |             |                                                                        |                                                                        |   |   |   |                                       |
|---|-------|-------------|------------------------------------------------------------------------|------------------------------------------------------------------------|---|---|---|---------------------------------------|
| 2 | TSUM2 | °Cday       | Thermal time from anthesis to maturity                                 | 760                                                                    | - | - | - | -                                     |
| 3 | SLATB |             | Table with specific leaf area as a function of development stage (DVS) | 0.00, 0.0022, 0.50, 0.0022                                             | - | - | - | 0.00, 0.0040, 0.60, 0.0022, -         |
| 4 | LAICR | -           | Critical leaf area index for overshadowing                             | 4                                                                      | - | - | - | 4.5                                   |
| 5 | RUETB | g DM/MJ PAR | Light use efficiency table for biomass production as function of DVS   | 0.00, 3.00, 1.00, 3.00, 1.30, 3.00, 2.00, 0.40                         | - | - | - | 0.00, 3.30, -                         |
| 6 | FRTB  | -           | Table fraction of total dry matter to roots as a function of DVS       | 0.00, 0.60, 0.40, 0.55, 1.00, 0.00, 2.00, 0.00                         | - | - | - | 2.00, 0.40, 0.00, 0.50, 0.50, 0.50, - |
| 7 | FLTB  | -           | Table fraction of above-gr. DM to leaves as a function of DVS          | 0.00, 1.00, 0.33, 1.00, 0.80, 0.40, 1.00, 0.10, 1.01, 0.00, 2.00, 0.00 | - | - | - | -                                     |
| 8 | FSTB  | -           | Table fraction of above-gr. DM to stems as a function of DVS           | 0.00, 0.00, 0.33, 0.00, 0.80, 0.60, 1.00, 0.90, 1.01, 0.15, 2.00, 0.00 | - | - | - | -                                     |
|   |       | -           | Table fraction of above-gr. DM to storage organs as a function of DVS  | 0.00, 0.00, 0.80, 0.00, 1.00, 0.00, 1.01, 0.85                         | - | - | - | -                                     |

|        |    |                              |                      |                                                                                                    |                                                                                  |                       |                       |                       |                                                    |
|--------|----|------------------------------|----------------------|----------------------------------------------------------------------------------------------------|----------------------------------------------------------------------------------|-----------------------|-----------------------|-----------------------|----------------------------------------------------|
|        | 9  | RDRLTB                       | 1/day                | Table of relative death rate of leaves as a function of daily mean temperature                     | 2.00, 1.00<br>-10., 0.00,<br>10., 0.02,<br>15., 0.03,<br>30., 0.05,<br>50., 0.09 | -<br>-<br>-<br>-<br>- | -<br>-<br>-<br>-<br>- | -<br>-<br>-<br>-<br>- | 0.95,<br>-<br>-<br>-<br>30., 0.03,<br>-            |
|        | 10 | RDRRTB                       | 1/d                  | Table relative death rate of stems as a function of DVS                                            | 0.00, 0.000,<br>1.50, 0.000,<br>1.5001,<br>0.020,<br>2.00, 0.020                 | -<br>-<br>-<br>-<br>- | -<br>-<br>-<br>-<br>- | -<br>-<br>-<br>-<br>- | -<br>-<br>1.5001,<br>0.025,<br>2.00,<br>0.025<br>- |
|        | 11 | DVSDLT                       | -                    | Development stage above which death of leaves starts in dependence of mean daily temperature       | 1                                                                                | -                     | -                     | -                     | 1.1                                                |
| LOBELL | 1  | beta_intercept               | day                  | Intercept of model to predict days to heading                                                      | 246.7                                                                            | 174.3                 | -                     | -                     | -                                                  |
|        | 2  | beta_gdd_105d                | day / °Cd            | Coefficient on degree days for first 105 days after sowing, used to predict days to heading        | -0.03905                                                                         | -0.05193              | -                     | -                     | -                                                  |
|        | 3  | beta_dl_105d                 | °C                   | Coefficient on average day length for first 105 days after sowing, used to predict days to heading | -8.31896                                                                         | -0.3399               | -                     | -                     | -                                                  |
|        | 4  | Tavg_veg                     | °C                   | Mean air temperature, vegetative stage                                                             | 0.138721                                                                         | -                     | -                     | -                     | -                                                  |
|        | 5  | eval(tavg_veg <sup>2</sup> ) | °C                   | Quadratic term of mean air temperature, vegetative phase                                           | -0.003574                                                                        | -                     | -                     | -                     | -                                                  |
|        | 6  | dtr_veg                      | °C                   | Diurnal temperature range, vegetative phase                                                        | 0.103487                                                                         | -                     | -                     | -                     | -                                                  |
|        | 7  | tavg_rep                     | °C                   | Mean air temperature, reproductive phase                                                           | 0.199767                                                                         | -                     | -                     | -                     | -                                                  |
|        | 8  | eval(tavg_rep <sup>2</sup> ) | °C                   | Quadratic term of mean air temperature, reproductive phase                                         | -0.014297                                                                        | -                     | -                     | -                     | -                                                  |
|        | 9  | dtr_rep                      | °C                   | Diurnal temperature range, reproductive phase                                                      | -0.028752                                                                        | -                     | -                     | -                     | -                                                  |
|        | 10 | tavg_gf                      | °C                   | Mean air temperature, grain filling phase                                                          | -0.497589                                                                        | -                     | -                     | -                     | -                                                  |
|        | 11 | eval(tavg_gf <sup>2</sup> )  | °C                   | Quadratic term of mean air temperature, grain filling phase                                        | 0.007916                                                                         | -                     | -                     | -                     | -                                                  |
|        | 12 | dtr_gf                       | °C                   | Diurnal temperature range, grain filling phase                                                     | 0.061284                                                                         | -                     | -                     | -                     | -                                                  |
|        | 13 | srad_veg                     | MJ/m <sup>2</sup> /d | Shortwave radiation, vegetative                                                                    | 0.021968                                                                         | -                     | -                     | -                     | -                                                  |

|       |    |                          |                      |                                                                                                                                                                             |            |      |      |      |      |
|-------|----|--------------------------|----------------------|-----------------------------------------------------------------------------------------------------------------------------------------------------------------------------|------------|------|------|------|------|
|       | 14 | srad_rep                 | MJ/m <sup>2</sup> /d | phase<br>Shortwave radiation, reproductive phase                                                                                                                            | -0.013403  | -    | -    | -    | -    |
|       | 15 | srad_gf                  | MJ/m <sup>2</sup> /d | Shortwave radiation, grain filling phase                                                                                                                                    | 0.066979   | -    | -    | -    | -    |
|       | 16 | dl_veg                   | hour                 | Daylength, vegetative phase                                                                                                                                                 | -1.006823  | -    | -    | -    | -    |
|       | 17 | dl_rep                   | hour                 | Daylength, reproductive phase                                                                                                                                               | 0.54261    | -    | -    | -    | -    |
|       | 18 | dl_gf                    | hour                 | Daylength, grain filling phase                                                                                                                                              | -0.139909  | -    | -    | -    | -    |
|       | 19 | vpd_veg                  | kPa                  | Vapor pressure deficit, vegetative phase                                                                                                                                    | -0.001429  | -    | -    | -    | -    |
|       | 20 | vpd_rep                  | kPa                  | Vapor pressure deficit, reproductive phase                                                                                                                                  | -0.005764  | -    | -    | -    | -    |
|       | 21 | vpd_gf                   | kPa                  | Vapor pressure deficit, grain filling phase                                                                                                                                 | -0.004475  | -    | -    | -    | -    |
|       | 22 | year                     | -                    | Growing season                                                                                                                                                              | 0.028822   | -    | -    | -    | -    |
|       | 23 | tavg_veg:vpd_veg         | -                    | Interaction between mean air temperature and vapor pressure deficit, vegetative phase                                                                                       | 0.000061   | -    | -    | -    | -    |
|       | 24 | tavg_rep:vpd_rep         | -                    | Interaction between mean air temperature and vapor pressure deficit, reproductive phase                                                                                     | 0.000461   | -    | -    | -    | -    |
|       | 25 | tavg_gf:vpd_gf           | -                    | Interaction between mean air temperature and vapor pressure deficit, grain filling phase                                                                                    | 0.000406   | -    | -    | -    | -    |
|       | 26 | eval(tavg_veg)^2:vpd_veg | -                    | Interaction between quadratic term of the mean air temperature and vapor pressure deficit, vegetative phase                                                                 | -0.0000012 | -    | -    | -    | -    |
|       | 27 | eval(tavg_rep)^2:vpd_rep | -                    | Interaction between quadratic term of the mean air temperature and vapor pressure deficit, reproductive phase                                                               | -0.0000067 | -    | -    | -    | -    |
|       | 28 | eval(tavg_gf)^2:vpd_gf   | -                    | Interaction between quadratic term of the mean air temperature and vapor pressure deficit, grain filling phase                                                              | -0.0000088 | -    | -    | -    | -    |
| LPJmL | 1  | PHU                      | °Cday                | Thermal time from sowing to maturity                                                                                                                                        | 2022       | 2060 | 1600 | 2392 | 2060 |
|       | 2  | ps                       | hour                 | Saturating photoperiod, it controls the calculation of the factor that reduces the daily heat units as response to photoperiod                                              | 20         | 14   | -    | -    | -    |
|       | 3  | psens                    | -                    | Sensitivity to the photoperiod effect [0-1](1 means no sensitivity), it controls the calculation of the factor that reduces the daily heat units as response to photoperiod | 1          | 0.8  | -    | -    | -    |

|             |    |                           |                                |                                                                                        |        |          |        |        |        |
|-------------|----|---------------------------|--------------------------------|----------------------------------------------------------------------------------------|--------|----------|--------|--------|--------|
|             | 4  | harvest index             | -                              | Ratio between grain yield and DM                                                       | -      | -        | -      | -      | 0.45   |
|             | 5  | LAI <sub>max</sub>        | m <sup>2</sup> /m <sup>2</sup> | Maximum leaf area index                                                                | -      | -        | -      | -      | 8      |
|             | 6  | fphu_c                    | -                              | Parameter that defines the shape of the leaf development curve during growing season 1 | -      | -        | -      | -      | 0.15   |
|             | 7  | fphu_k                    | 0-                             | Parameter that defines the shape of the leaf development curve during growing season 2 | -      | -        | -      | -      | 0.4    |
|             | 8  | flimax_k                  | -                              | Fraction of plant maximal LAI                                                          | -      | -        | -      | -      | 0.97   |
|             | 9  | fphu_sen                  | -                              | Fraction of growing period at which LAI starts decreasing                              | -      | -        | -      | -      | 0.5    |
|             | 10 | α-a                       | -                              | Factor to scale leaf-level biomass production to stand level                           | -      | -        | -      | -      | 1      |
| MCWLA-Wheat | 1  | RmaxVGP1                  | -                              | Maximum development rate per day from emergence to terminal spikelet initiation        | 0.018  | 0.016375 | 0.0155 | 0.0235 | 0.0165 |
|             | 2  | RmaxVGP2                  | -                              | Maximum development rate per day from terminal spikelet initiation to anthesis         | 0.019  | 0.0178   | 0.017  | 0.0495 | 0.0202 |
|             | 3  | RmaxRGP                   | -                              | Maximum development rate per day from anthesis to maturity                             | 0.0305 | 0.03175  | 0.023  | 0.155  | 0.0298 |
|             | 4  | rmaxv1                    | -                              | Maximum daily development rate between emergence to terminal spikelet initiation       | -      | 0.0165   | -      | -      | -      |
|             | 5  | rmaxv2                    | -                              | Maximum daily development rate between terminal spikelet initiation to anthesis        | -      | 0.0202   | -      | -      | -      |
|             | 6  | rmaxr                     | -                              | Maximum daily development rate between anthesis to maturity                            | -      | 0.0298   | -      | -      | -      |
|             | 7  | photos                    | -                              | Sensitivity to photoperiod                                                             | -      | 0.36     | -      | -      | -      |
|             | 8  | Pc                        | -                              | Critical photoperiod                                                                   | -      | 8        | -      | -      | -      |
| MONICA      | 1  | pc_StageTemperatureSum[1] | °Cday                          | Thermal time between sowing and crop emergence                                         | 148    | 158.3    | 80     | 205    | -      |
|             | 2  | pc_StageTemperatureSum[2] | °Cday                          | Thermal time between emergence and double ridge                                        | 284    | -        | -      | -      | -      |
|             | 3  | pc_StageTemperatureSum[3] | °Cday                          | Thermal time between double ridge and begin flowering                                  | 510    | 383.33   | 330    | 760    | -      |
|             | 4  | pc_StageTemperatureSum[4] | °Cday                          | Thermal time between begin flowering and full flowering                                | 200    | 150      | 200    | 200    | -      |
|             | 5  | pc_StageTemperatureSum[5] | °Cday                          | Thermal time duration of grain filling                                                 | 660    | 507.86   | 222    | 570    | -      |
|             | 6  | pc_StageTemperatureSum[5] | °Cday                          | Thermal time duration of senescence                                                    | 25     | -        | -      | -      | -      |
|             | 7  | pc_BaseTemperature[1]     | °Cday                          | Base temperature between sowing and crop emergence                                     | 1      | -2.96    | 1      | 1      | -      |
|             | 8  | pc_BaseTemperature[2]     | °Cday                          | Base temperature between emergence and double ridge                                    | 1      | -        | -      | -      | -      |



|        |    |                            |                    |                                                                  |        |       |       |       |        |
|--------|----|----------------------------|--------------------|------------------------------------------------------------------|--------|-------|-------|-------|--------|
|        | 9  | pc_BaseTemperature[3]      | °Cday              | Base temperature between double ridge and begin flowering        | 1      | -1.22 | 1     | 1     | -      |
|        | 10 | pc_BaseTemperature[4]      | °Cday              | Base temperature between begin flowering and full flowering      | 1      | 5.34  | 1     | 1     | -      |
|        | 11 | pc_BaseTemperature[5]      | °Cday              | Base temperature during grain filling                            | 0      | 6     | 9     | 9     | -      |
|        | 12 | pc_BaseTemperature[6]      | °Cday              | Base temperature during senescence                               | 9      | 6     | 9     | 9     | -      |
|        | 13 | pc_DaylengthRequirement[1] | day                | Daylength requirement between sowing and crop emergence          | 0      | -     | -     | -     | -      |
|        | 14 | pc_DaylengthRequirement[2] | day                | Daylength requirement between emergence and double ridge         | 0      | 12.3  | 0     | 0     | -      |
|        | 15 | pc_DaylengthRequirement[3] | day                | Daylength requirement between double ridge and begin flowering   | 0      | 16.67 | 0     | 0     | -      |
|        | 16 | pc_DaylengthRequirement[4] | day                | Daylength requirement between begin flowering and full flowering | 0      | 16.67 | 0     | 0     | -      |
|        | 17 | pc_DaylengthRequirement[5] | day                | Daylength requirement during grain filling                       | 0      | -     | -     | -     | -      |
|        | 18 | pc_DaylengthRequirement[6] | day                | Daylength requirement during senescence                          | 0      | -     | -     | -     | -      |
|        | 19 | pc_BaseDaylength[1]        | day                | Base daylength between sowing and crop emergence                 | 0      | -     | -     | -     | -      |
|        | 20 | pc_BaseDaylength[2]        | day                | Base daylength between emergence and double ridge                | 0      | 1.33  | 0     | 0     | -      |
|        | 21 | pc_BaseDaylength[3]        | day                | Base daylength between double ridge and begin flowering          | 0      | 1.33  | 0     | 0     | -      |
|        | 22 | pc_BaseDaylength[4]        | day                | Base daylength between begin flowering and full flowering        | 0      | 1.33  | 0     | 0     | -      |
|        | 28 | pc_SpecificLeafArea[1]     | cm <sup>2</sup> /g | Specific leaf area at double ridge                               | 0.002  | -     | -     | -     | 0.0037 |
|        | 29 | pc_SpecificLeafArea[2]     | cm <sup>2</sup> /g | Specific leaf area at double ridge                               | 0.0019 | -     | -     | -     | 0.0015 |
|        | 30 | pc_SpecificLeafArea[3]     | cm <sup>2</sup> /g | Specific leaf area at double ridge                               | 0.0018 | -     | -     | -     | 0.0013 |
|        | 31 | pc_SpecificLeafArea[4]     | cm <sup>2</sup> /g | Specific leaf area at double ridge                               | 0.0017 | -     | -     | -     | 0.0012 |
|        | 32 | pc_SpecificLeafArea[5]     | cm <sup>2</sup> /g | Specific leaf area at double ridge                               | 0.0016 | -     | -     | -     | 0.0012 |
|        | 33 | pc_SpecificLeafArea[6]     | cm <sup>2</sup> /g | Specific leaf area at double ridge                               | 0.0016 | -     | -     | -     | 0.0012 |
| OLEARY | 1  | BASE1                      | °C                 | Base temperature for sowing to crop emergence                    | 3      | 0     | -     | -     | -      |
|        | 2  | BASE4                      | °C                 | Base temperature for sowing to anthesis                          | 2      | -     | -     | -     | -      |
|        | 3  | BASE5                      | °C                 | Base temperature for anthesis to maturity                        | 8      | 8     | -     | -     | 4      |
|        | 4  | DLB4                       | hour               | Base photoperiod for sowing to anthesis                          | -10    | 0     | -     | -     | -      |
|        | 5  | EMMDD                      | °Cday              | Thermal time between sowing and crop emergence                   | 100    | 259   | 92    | 438   | 180    |
|        | 6  | ANTHDL                     | °Cday              | Photothermal time between sowing and anthesis                    | 23700  | 15012 | 14158 | 16677 | 13800  |
|        | 7  | MATDD                      | °Cday              | Thermal time between anthesis and maturity                       | 465    | 488   | 306   | 677   | 714    |
|        | 8  | MINTE                      | kg/ha/mm           | Minimum transpiration efficiency                                 | 25     | -     | 25    | 25    | 58     |

|               |    |                    |                                |                                                                             |       |       |       |       |       |
|---------------|----|--------------------|--------------------------------|-----------------------------------------------------------------------------|-------|-------|-------|-------|-------|
|               | 9  | NTT                | °Cday                          | Period to transfer nitrogen to grain                                        | 300   | -     | -     | -     | 500   |
|               | 10 | GRMAX              | mg/day                         | Maximum grain growth rate                                                   | 2.8   | -     | -     | -     | 2.5   |
|               | 11 | GXM                | mg                             | Maximum potential grain dry mass                                            | 70    | -     | -     | -     | 55    |
|               | 12 | PRES               | %                              | Maximum proportion of biomass at anthesis that can be translocated to grain | 40    | -     | -     | -     | 20    |
|               | 13 | SLNOPT             | g/m <sup>2</sup>               | Optimum specific canopy nitrogen                                            | 3     | -     | -     | -     | 2.6   |
|               | 14 | EMOPTT             | °C                             | Optimal temperature for emergence (additional parameter)                    | -     | -     | -     | -     | 20    |
|               | 15 | EMMAXT             | °C                             | Maximum temperature for emergence (additional parameter)                    | -     | -     | -     | -     | 22    |
|               | 16 | ANOPTT             | °C                             | Optimal temperature for anthesis (additional parameter)                     | -     | -     | -     | -     | 20    |
|               | 17 | ANMAXT             | °C                             | Maximum temperature for anthesis (additional parameter)                     | -     | -     | -     | -     | 22    |
|               | 18 | MATDD2             | °Cday                          | Thermal time between anthesis and maturity (additional parameter)           | -     | -     | -     | -     | 290   |
|               | 19 | BASE55             | °C                             | Base temperature for anthesis to maturity (additional parameter)            | -     | -     | -     | -     | 15    |
| SALUS         | 1  | LEgg               | leaf eq.                       | Leaf equivalents for grain growth                                           | 5.5   | 6.1   | 3.7   | 7.5   | 6.2   |
|               | 2  | phyll              | °Cday                          | Phyllochron                                                                 | 120   | 104   | 79.5  | 132   | 102   |
| SIMPLACE      | 1  | PhotoresponseTable | -                              | Photoperiod reduction factor (for photoperiod < 8 hours/day)                | 0     | 0.4   | -     | -     | -     |
|               | 2  | PTTAnthesis        | °Cday                          | Required photo-thermal time (between emergence to anthesis)                 | 289   | 584.2 | 725.7 | 538.3 | 584.2 |
|               | 3  | TTMaturity         | °Cday                          | Required thermal time between anthesis and maturity                         | 427   | 425.8 | 111.3 | 623.7 | 425.8 |
|               | 4  | ILAI               | -                              | Initial value of LAI                                                        | 0.012 | -     | -     | -     | 0.017 |
| SIRIUS        | 1  | TTBGEB             | °Cday                          | Thermal time between beginning of grain filling and physiological maturity  | 600   | -     | 400   | 650   | 650   |
|               | 2  | TTEGMAT            | °Cday                          | Thermal time between physiological maturity and harvest maturity            | 150   | -     | 10    | 140   | 100   |
|               | 3  | AreaMax            | m <sup>2</sup> /m <sup>2</sup> | Potential maximum leaf surface area                                         | 0.004 | -     | 0.005 | 0.005 | -     |
|               | 4  | PHYLL              | °Cday                          | Phyllochron                                                                 | 105   | 90    | 105   | 137   | 125   |
|               | 5  | AMNLFNO            | leaf                           | Minimum possible leaf number                                                | 8     | 7     | 6.5   | 6.5   | -     |
|               | 6  | AMXLFNO            | leaf                           | Absolute maximum leaf number                                                | 24    | 18    | -     | -     | -     |
|               | 7  | SLDL               | leaf/h daylength               | Daylength response in leaf production                                       | 0     | 0.9   | 0.1   | 0.1   | -     |
| SiriusQuality | 1  | TTsoem             | 1/[°Cday]                      | Thermal time between sowing and crop emergence                              | 190   | -     | 70    | 390   | 190   |
|               | 2  | SLDL               | leaf/hour daylength            | Daylength response of leaf production                                       | 0.8   | 0.79  | 0.49  | 4.4   | 0.79  |
|               | 3  | VAI                | 1/[°Cd]                        | Response of vernalization rate to temperature                               | 0     | 0.004 | 0     | 0     | 0.004 |
|               | 4  | VBBE               | 1/day                          | Vernalization rate at 0°C                                                   | 0     | 0.02  | 0     | 0     | 0.02  |
|               | 5  | IntermTvern        | °C                             | Intermediate temperature for vernalization to occur                         | 8     | 15.5  | 8     | 8     | 15.5  |

|           |   |           |            |                                                                                                                                       |         |      |                             |                             |       |
|-----------|---|-----------|------------|---------------------------------------------------------------------------------------------------------------------------------------|---------|------|-----------------------------|-----------------------------|-------|
|           | 6 | MaxTvern  | °C         | Maximum temperature for vernalization to occur                                                                                        | 17      | 48.5 | 17                          | 17                          | 48.5  |
|           | 7 | PhyllSSLL | Phyllocron | Potential phyllochronic duration of the senescence period for the leaves produced before floral initiation                            | 3.3     | 2.8  | -                           | -                           | -     |
|           | 8 | PhyllSBLL | Phyllocron | Potential phyllochronic duration of the senescence period for the leaves produced after floral initiation                             | 6       | 2.8  | -                           | -                           | -     |
|           | 9 | PhyllMBLL | Phyllocron | Potential phyllochronic duration between end of expansion and beginning of senescence for the leaves produced after floral initiation | 6       | 4    | -                           | -                           | -     |
| STICS     | 1 | stlevamf  | °Cday      | Thermal time between emergence and end of juvenile phase                                                                              | 245     | 225  | Fixed Anthesis and Maturity | Fixed Anthesis and Maturity | 225   |
|           | 2 | stamflax  | °Cday      | Thermal time between end of juvenile phase and max LAI                                                                                | 390     | 290  | Fixed Anthesis and Maturity | Fixed Anthesis and Maturity | 235   |
|           | 3 | stlevdrp  | °Cday      | Thermal time between emergence and beginning of grain filling                                                                         | 940     | 563  | Fixed Anthesis and Maturity | Fixed Anthesis and Maturity | 563   |
|           | 4 | stdrpmat  | °Cday      | Thermal time between beginning of grain filling and maturity                                                                          | 755     | 824  | Fixed Anthesis and Maturity | Fixed Anthesis and Maturity | 824   |
|           | 5 | sensiphot | -          | photoperiod sensitivity [0-1] (1 means no sensitivity)                                                                                | 0.8     | 0.1  | Fixed Anthesis and Maturity | Fixed Anthesis and Maturity | 0.1   |
|           | 6 | adens     | -          | Interplant competition parameter                                                                                                      | -0.6    | -0.6 | Fixed Anthesis and Maturity | Fixed Anthesis and Maturity | -0.44 |
|           | 7 | durvieF   | -          | maximal lifespan of an adult leaf                                                                                                     | 205     | -    | Fixed Anthesis and Maturity | Fixed Anthesis and Maturity | 175   |
| WHEATGROW | 1 | IE        |            | Intrinsic earliness                                                                                                                   | 0.91    | -    | 0.71                        | 1.6                         | 0.77  |
|           | 2 | PS        |            | Photoperiod sensitivity                                                                                                               | 0.00015 | -    | -                           | -                           | -     |
|           | 3 | TS        |            | Thermal sensitivity                                                                                                                   | 0.95    | -    | 0.01                        | 0.98                        | 0.93  |
|           | 4 | BFF       |            | Basic filling factor                                                                                                                  | 0.92    | -    | 0.32                        | 5                           | 0.81  |
| WFOST     | 1 | TSUM1     | °Cday      | Thermal time between crop emergence and anthesis                                                                                      | 1220    | 1160 | 878                         | 1334                        | -     |

|   |       |       |                                                                          |     |     |     |      |      |
|---|-------|-------|--------------------------------------------------------------------------|-----|-----|-----|------|------|
| 2 | TSUM2 | °Cday | Thermal time between anthesis and maturity                               | 770 | 856 | 448 | 1002 | -    |
| 3 | TDWI  | kg/ha | Initial total crop DM                                                    | 210 | -   | -   | -    | 350  |
| 4 | FLTb  | kg/kg | Fraction of above-ground DM to leaves as a function of DVS, at DVS 0.5   | 0.5 | -   | -   | -    | 0.6  |
| 5 | FLTb  | kg/kg | Fraction of above-ground DM to leaves as a function of DVS, at DVS 0.646 | 0.3 | -   | -   | -    | 0.45 |
| 6 | FSTb  | kg/kg | Fraction of above-ground DM to stems as a function of DVS, at DVS 0.5    | 0.5 | -   | -   | -    | 0.4  |
| 7 | FSTb  | kg/kg | Fraction of above-ground DM to stems as a function of DVS, at DVS 0.646  | 0.7 | -   | -   | -    | 0.55 |

---

577

578
